# Supplementary material for: VRAI-selectivity: calculation of selectivity beyond transition state theory
Source: Royal Society of Chemistry journal article supplement (doi:10.1039/d1ob00234a), 2021-01-01
Supplement: d1ob00234a1.pdf [file d1ob00234a1.pdf]

## **Supplementary Information**

### **VRAI-Selectivity: Calculation of Selectivity Beyond Transition State Theory**

Sanha Lee, Jonathan M. Goodman

Department of Chemistry, University of Cambridge  
Lensfield Road, Cambridge, CB1 1EW

## TABLE OF CONTENTS

|                                                           |           |
|-----------------------------------------------------------|-----------|
| <b>S1. REACTION LIST .....</b>                            | <b>3</b>  |
| <b>S2. COMPUTATIONAL METHODS .....</b>                    | <b>5</b>  |
| <b>S3. IRC CALCULATIONS FROM HYDROBORATION STUDY.....</b> | <b>6</b>  |
| <b>S4. CORRECTION TO THE PREDICTED RATIOS .....</b>       | <b>7</b>  |
| <b>S5. USER MANUAL.....</b>                               | <b>8</b>  |
| <b>S6. CARTESIAN COORDINATES .....</b>                    | <b>11</b> |
| <b>S7. DIMENSIONALITY REDUCTION TESTS .....</b>           | <b>32</b> |
| <b>S8. ALL FINAL RESULTS .....</b>                        | <b>33</b> |
| <b>S9. TS1 AND TS2 FREE ENERGY DIFFERENCE.....</b>        | <b>34</b> |

## S1. Reaction List

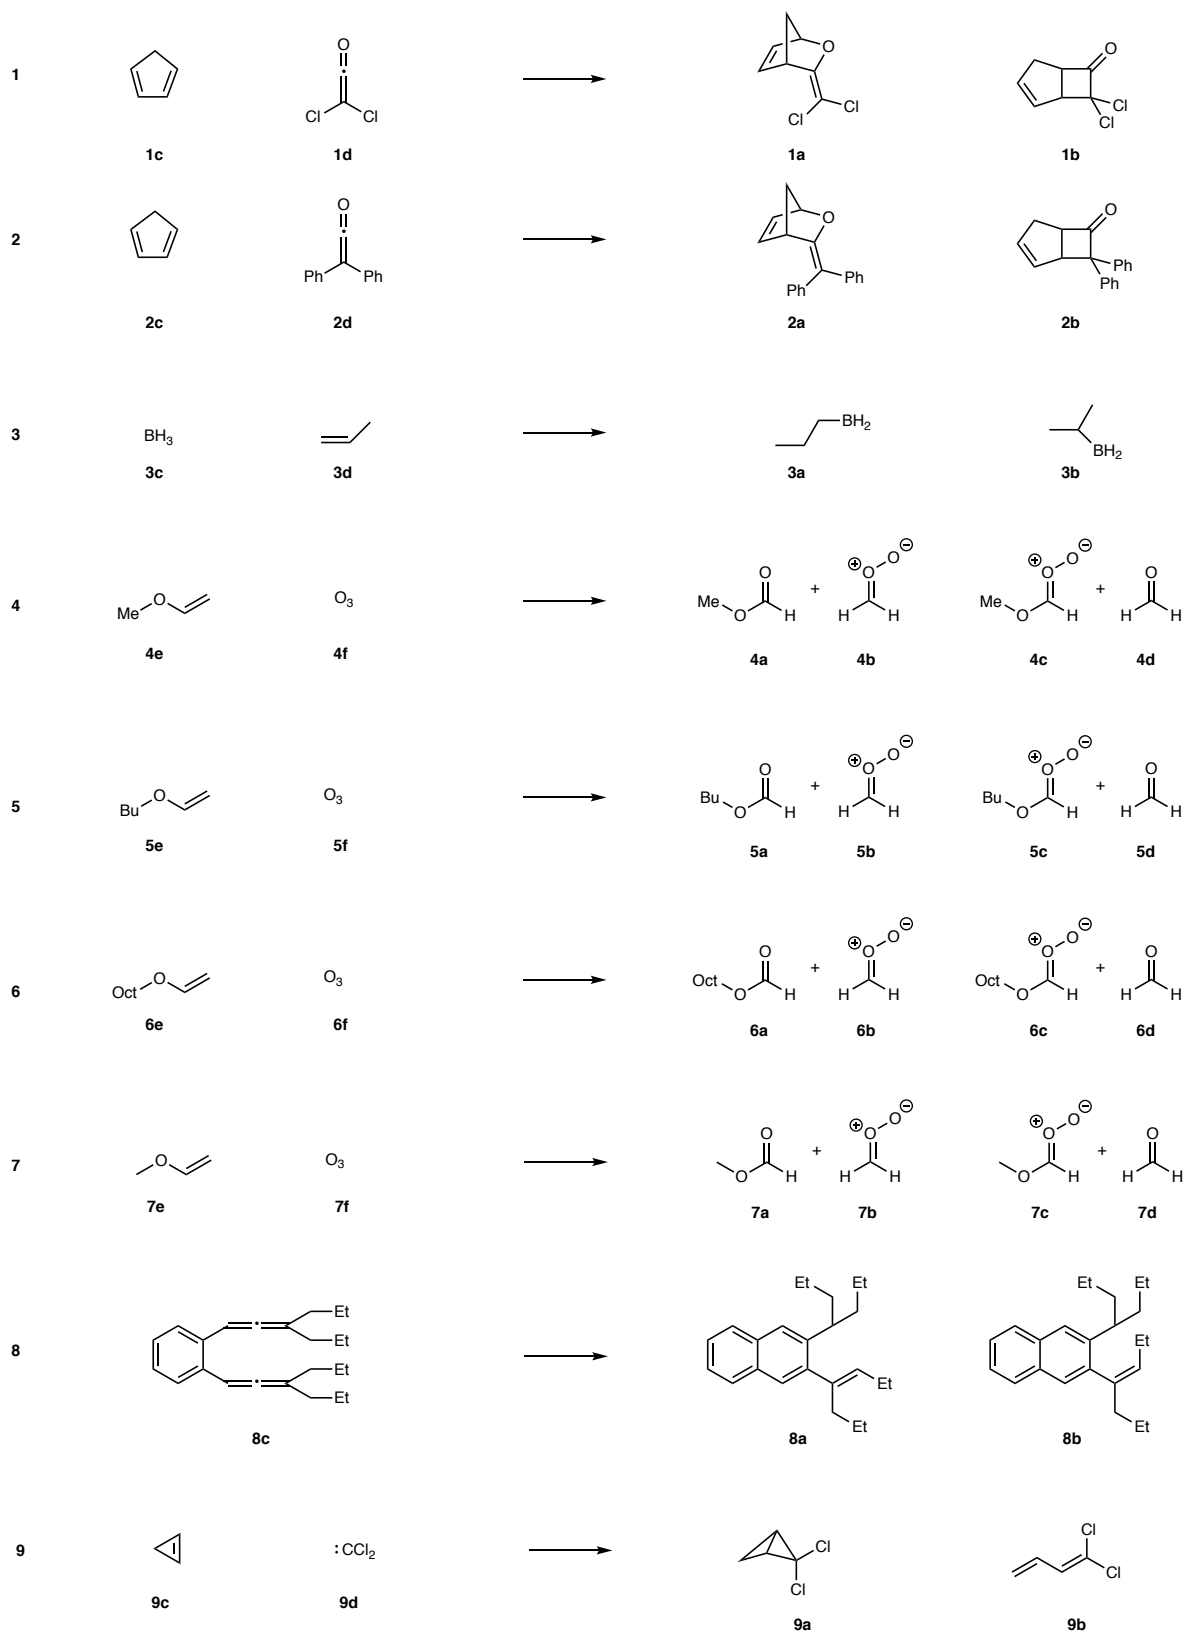

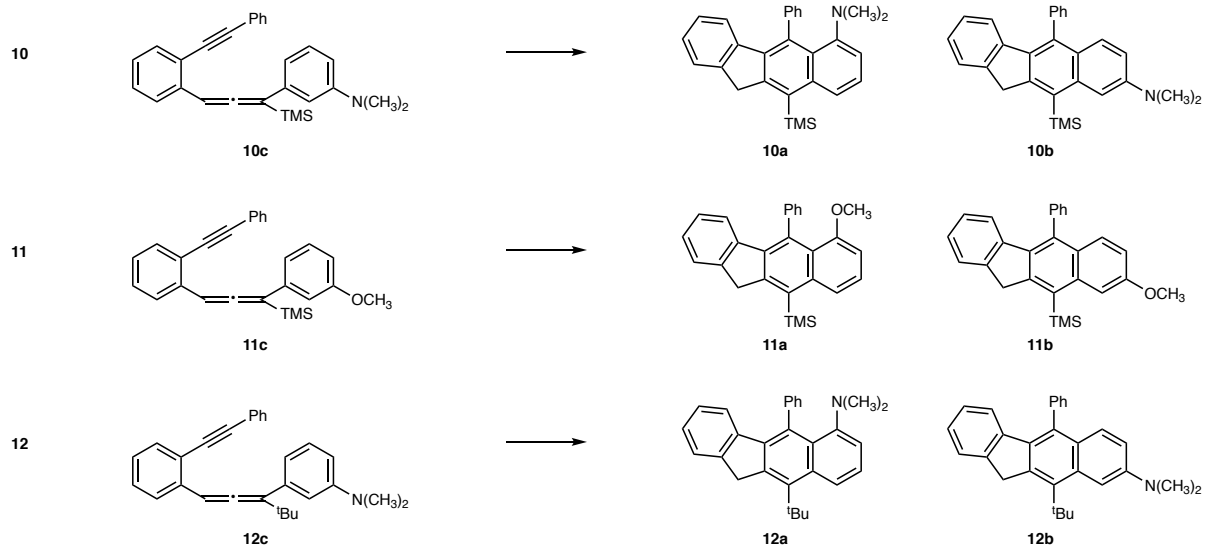

## S2. Computational Methods

The geometries were optimised by taking the coordinates from the published work as the starting point. We have used the same functional and basis set as stated in the original publications. All optimisations were performed in gas phase.

**Table S1.** Theoretical methods used for all reactions

| <b>Reaction No.</b> | <b>Functional</b> | <b>Basis Set</b> |
|---------------------|-------------------|------------------|
| 1-2                 | B3LYP             | 6-31G(d)         |
| 3                   | B3LYP             | 6-31G(d)         |
| 4-7                 | B3LYP             | 6-31G(2df,p)     |
| 8                   | UB3LYP            | 6-31G(d,p)       |
| 9                   | B3LYP             | 6-31G(d)         |
| 10-12               | BLYP              | 6-31G(d)         |

### S3. IRC Calculations from Hydroboration Study

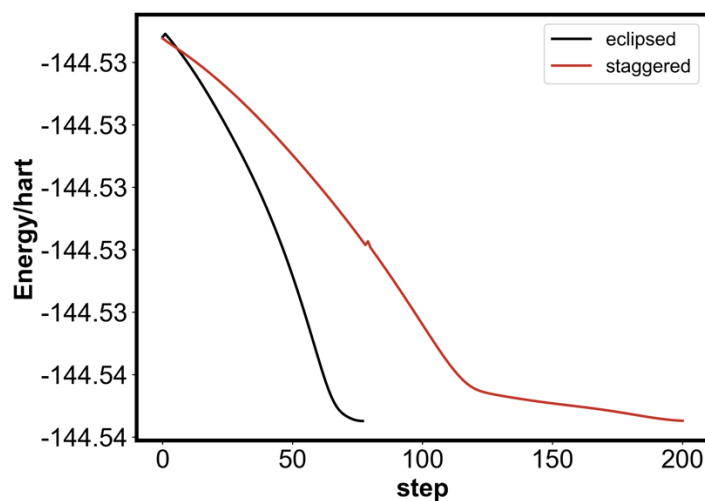

**Figure S1.** IRC profile comparison between eclipsed TS1 geometry and staggered TS1 geometry from Singleton *et al.* 2009

The structure corresponding to the free energy barrier to the intermediate formation (taken directly from Singleton *et al.*<sup>1</sup>) had eclipsing hydrogens between the BH<sub>3</sub> and the alkene molecules (Figure 5 from the main text). The frequency calculation on this structure showed two imaginary frequencies; one at -60.0 and the other at -12.9 mdyne/Å. The visualisation of the normal mode showed the -60.0 frequency corresponds to the two fragments approaching each other and the -12.9 frequency corresponds to the rotation of the BH<sub>3</sub> fragment. The IRC calculation starting from this geometry quickly converged to the intermediate with a smooth energy profile.

The second imaginary frequency can be removed by performing a constrained optimization. The optimized structure has the hydrogens on the BH<sub>3</sub> and the alkene units staggered. However, the IRC calculation starting from this geometry takes significantly longer to converge to the intermediate than the eclipsing hydrogen transition state. Furthermore, the IRC profile shows two distinct slopes corresponding to the BH<sub>3</sub> approaching the alkene and BH<sub>3</sub> rotation. Therefore, the TS1 geometry with the eclipsing hydrogen is a better structure to use as TS1 geometry.

#### References

(1) Oyola, Y.; Singleton, D. A. Dynamics and the Failure of Transition State Theory in Alkene Hydroboration. *J. Am. Chem. Soc.* 2009, 131, 3130–3131.

## S4. Correction to the Predicted Ratios

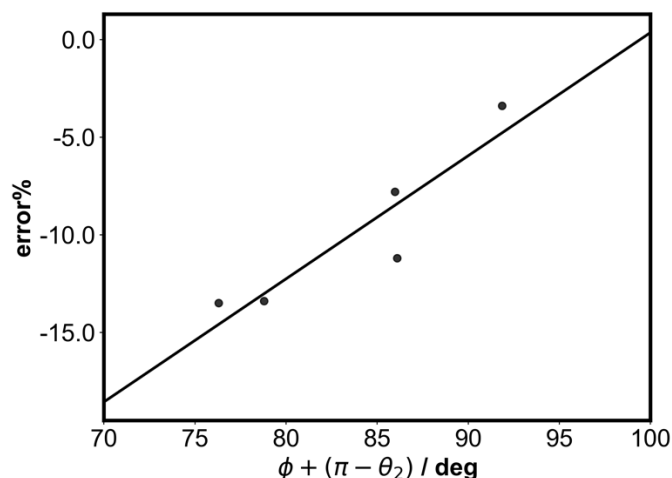

Figure S2. Line of best fit plot for error in prediction against  $\phi + (\pi - \theta_2)$

The initial predictions from VRAI-selectivity tends to under predict the product ratios. However, we have found a strong correlation ( $R^2 = 0.84$ ) between the percentage error in the prediction and the angle  $\phi + (\pi - \theta_2)$  (see Figure 3 from the main text for the angle definitions). We have therefore used this correlation to correct the initially predicted ratios. In the plot, we have excluded the diphenylketene reaction from Singleton 2006<sup>2</sup> (Reaction 2, where the selectivity is predicted using TST) and the octane and dimethyl octane reactions from Singleton 2011<sup>3</sup>. As discussed in the main text, the effects of energy transfer in long alkane chains are still under investigation.

### References

(2) Ussing, B. R.; Hang, C.; Singleton, D. A. Dynamic Effects on the Periselectivity, Rate, Isotope Effects, and Mechanism of Cycloadditions of Ketenes with Cyclopentadiene. *J. Am. Chem. Soc.* 2006, 128, 7594–7607.

(3) Quijano, L. M. M.; Singleton, D. A. Competition between Reaction and Intramolecular Energy Redistribution in Solution: Observation and Nature of Nonstatistical Dynamics in the Ozonolysis of Vinyl Ethers. *J. Am. Chem. Soc.* 2011, 133, 13824–13827.

## S5. User Manual

### CONTENTS

- 1) Requirements and Setup
- 2) Usage
- 3) Example Usage

=====

### 1) REQUIREMENTS AND SETUP

The script is currently set up to run on Python version 2.7. The following Python modules must be installed before the script can be run:

- numpy
- argparse
- os
- math
- sys
- rdkit
- bisect
- pprint

The python script is designed to analyse Gaussian output files from Gaussian 16 only.

The script will only recognise the Gaussian output file if the frequency calculation is run independently. Do not run the calculation with 'opt' and 'freq' keywords at the same time. The following frequency keyword must be included in the calculation 'freq=(hpmodes,intmodes)'.

The python script requires the Gaussian output files to be in .mol file format. It is possible to convert the frequency output files to .mol file using Gaussview via File -> Convert Files.

### 2) CORRECT USAGE

The .mol files and .out files must be inputed in the following order.

```
python VRAI-selectivity.py TS1molfile.mol INTmolfile.mol P1molfile.mol P2molfile.mol TS1freq.out  
TS2freq.out [OPTIONAL TS2Afreq.out] [OPTIONAL TS2Bfreq.out] [OPTIONAL -I]
```

TS1molfile.mol - geometry of the first transition state in .mol file format

INTmolfile.mol - geometry of the intermediate in .mol file format

P1molfile.mol - geometry of the first product in .mol file format

P2molfile.mol - geometry of the second product in .mol file format

TS1freq.out - Gaussian16 frequency calculation output file for the first transition state

INTfreq.out - Gaussian16 frequency calculation output file for the intermediate

TS2Afreq.out - Gaussian16 frequency calculation output file for TS2A (optional)

TS2Bfreq.out - Gaussian16 frequency calculation output file for TS2B (optional)

-I - optional argument for intermediate activation

-S - optional argument for TST calculation

The analysis of reactions proceeding on the potential energy surface with an intermediate should use '-I' for intermediate activation.

- When -I option is used, the TS2A and TS2B Gaussian frequency output files must be provided (the algorithm will return an error message if these are not provided)



- When -l option is not used, do not provide TS2A or TS2B Gaussian frequency output files (the algorithm will return an error message if these are provided)
  - The TS2A must correspond to the P1 forming TS, connecting INT with P1
  - The TS2B must correspond to the P2 forming TS, connecting INT with P2
- The algorithm will read in the TS2 frequency output files and extract the free energy of the molecule. The free energy difference between TS1 and TS2 will be used to decide whether the algorithm uses TST or dynamic analysis for the selectivity calculation.

When '-S' activation is used, the algorithm will simply output the product distribution calculated from TST. This use only requires the TS2A and TS2B Gaussian 16 output files as the input. The correct execution of the code on the command line would be:

```
python VRAI-selectivity.py TS2Afreq.out TS2Bfreq.out -S
```

For bifurcation analysis, the INTmolfile should be replaced by TS2molfile which is the geometry of the second transition state. Do not use intermediate activation.

The key output will be in the following format:

- files corresponding to the major and minor product are stated
- the two  $\mu$  and  $\lambda$  values which decides the alignment type are given
- the length of vector  $|g|$  and the angle  $\varphi$  (angle between the reaction vector and vector  $g_{-}$  is stated

The algorithm will create a log file and print out

- whether the rdkit object was successfully created
- vectors  $p1_{-}$ ,  $p2_{-}$  and the imaginary eigenvector
- $\varphi$ : angle between the imaginary eigenvector,  $a_{-}$ , and vector  $g_{-}$  (displacement of TS2 from TS1)
- dot products, angles and magnitude of the key vectors
- uncommon bonds the algorithm has used for the selectivity prediction
- returns a warning sign for large  $|g_{-}|$  and when the predicted selectivity is low

### 3) EXAMPLE USAGE

The following files are provided for this section

- testP1freq.mol
- testP2freq.mol
- testTS1freq.mol
- testTS1freq.out
- testINTfreq.mol
- testINTfreq.out
- testTS2A.out
- testTS2B.out

Test the code on the example Gaussian output files given:

```
python VRAI-selectivity_v2.py testTS1freq.mol testINTfreq.mol testP1freq.mol testP2freq.mol
testTS1freq.out testINTfreq.out testTS2Afreq.out testTS2Bfreq.out -l
```

The Gaussian output files were generated by optimising the reaction published by Singleton et al in 2006 (Ussing, B. R.; Hang, C.; Singleton, D. A., J. Am. Chem. Soc. 2006, 128, 7594–7607). The correct execution should print out the following output.

```
**** Analysis Completed ****
```

```
Major product is testP2freq.mol
Minor product is testP1freq.mol
```

```
mu1_ = -0.0441868111245
mu2_ = 0.0484860277906
lambda1_ = 0.432580161859
```

lambda2\_ = 0.438546804793  
|g\_| = 0.483733089154  
phi = 6.62625149713

The algorithm will now proceed to estimate the major and minor product ratios

Product Ratio Calculation Completed:  
Major Product : Minor Product ratio  
82.9 : 30.1

\*\*\*\*\*

The algorithm should also create a log file called 'VRAI-selectivity\_testTS1freq.log' with all the key information.

## S6. Cartesian Coordinates

### 1-INT

|    |          |          |          |
|----|----------|----------|----------|
| C  | -1.15461 | 0.73069  | -0.62269 |
| C  | -1.26530 | 0.94330  | 0.83054  |
| C  | -2.27457 | 0.10012  | 1.34134  |
| C  | -2.91484 | -0.51824 | 0.29435  |
| C  | -2.47472 | 0.05989  | -1.01758 |
| O  | -0.50282 | -1.61411 | -0.53237 |
| C  | -0.08943 | -0.45422 | -0.44599 |
| C  | 1.17418  | -0.04428 | 0.03005  |
| Cl | 1.77324  | 1.59481  | -0.14277 |
| Cl | 2.41204  | -1.23748 | 0.26065  |
| H  | -0.79374 | 1.55411  | -1.23651 |
| H  | -0.63030 | 1.60340  | 1.40635  |
| H  | -2.46213 | -0.07890 | 2.39374  |
| H  | -3.68483 | -1.27631 | 0.38995  |
| H  | -3.19561 | 0.82081  | -1.35449 |
| H  | -2.36488 | -0.68826 | -1.80410 |

### 1-TS1

|    |          |          |          |
|----|----------|----------|----------|
| C  | 1.30323  | 0.72355  | 0.68231  |
| C  | 1.52286  | 1.01389  | -0.66095 |
| C  | 2.58485  | 0.18629  | -1.16867 |
| C  | 3.07990  | -0.56537 | -0.14960 |
| C  | 2.41378  | -0.19115 | 1.14070  |
| O  | 0.43657  | -1.73907 | 0.00288  |
| C  | -0.10621 | -0.66848 | 0.07659  |
| C  | -1.30629 | -0.05022 | -0.03113 |
| Cl | -1.62953 | 1.65938  | 0.09492  |
| Cl | -2.72710 | -1.07140 | -0.12642 |
| H  | 0.73242  | 1.34754  | 1.35798  |
| H  | 0.95701  | 1.73164  | -1.24306 |
| H  | 2.89161  | 0.14431  | -2.20712 |
| H  | 3.85350  | -1.32066 | -0.22981 |
| H  | 3.10526  | 0.38009  | 1.78079  |
| H  | 2.07773  | -1.05701 | 1.71796  |

### 1-TS2A

|    |          |          |          |
|----|----------|----------|----------|
| C  | -1.14105 | 0.82187  | -0.55786 |
| C  | -1.41636 | 0.99823  | 0.88194  |
| C  | -2.35245 | 0.04542  | 1.27917  |
| C  | -2.77224 | -0.64943 | 0.14785  |
| C  | -2.39354 | 0.11072  | -1.08660 |
| O  | -0.61367 | -1.52486 | -0.39132 |
| C  | -0.10117 | -0.38156 | -0.35295 |
| C  | 1.19383  | -0.04935 | 0.00902  |
| Cl | 1.83265  | 1.57873  | -0.10130 |
| Cl | 2.39182  | -1.29150 | 0.19659  |
| H  | -0.74511 | 1.66978  | -1.11264 |
| H  | -0.86036 | 1.66509  | 1.52993  |
| H  | -2.60374 | -0.20464 | 2.30317  |
| H  | -3.41215 | -1.52442 | 0.15030  |
| H  | -3.16909 | 0.85394  | -1.32532 |
| H  | -2.21829 | -0.51904 | -1.95829 |

## 1-TS2B

|    |          |          |          |
|----|----------|----------|----------|
| C  | -1.16650 | 0.77382  | -0.60475 |
| C  | -1.11055 | 0.85776  | 0.87663  |
| C  | -2.10700 | 0.00165  | 1.41450  |
| C  | -2.88879 | -0.48098 | 0.40128  |
| C  | -2.54067 | 0.16398  | -0.91098 |
| O  | -0.48356 | -1.55672 | -0.82956 |
| C  | -0.11276 | -0.40631 | -0.61511 |
| C  | 1.11889  | -0.03949 | 0.01714  |
| Cl | 1.79696  | 1.57537  | -0.13932 |
| Cl | 2.30422  | -1.27499 | 0.30444  |
| H  | -0.86589 | 1.65128  | -1.17531 |
| H  | -0.46366 | 1.51506  | 1.44028  |
| H  | -2.19909 | -0.25518 | 2.46363  |
| H  | -3.69555 | -1.19674 | 0.52040  |
| H  | -3.26691 | 0.95518  | -1.15055 |
| H  | -2.51628 | -0.54490 | -1.74132 |

## 1a

|    |          |          |          |
|----|----------|----------|----------|
| C  | 1.13638  | 1.03106  | 0.29779  |
| C  | 1.93025  | 0.97752  | -1.00974 |
| C  | 2.59378  | -0.18762 | -1.02486 |
| C  | 2.22289  | -0.89502 | 0.26658  |
| C  | 2.11923  | 0.28057  | 1.24657  |
| O  | 0.78665  | -1.27389 | 0.15068  |
| C  | 0.10855  | -0.08911 | 0.14873  |
| C  | -1.22176 | -0.01506 | 0.02127  |
| Cl | -2.06747 | 1.51505  | 0.03211  |
| Cl | -2.22044 | -1.42881 | -0.15007 |
| H  | 0.73902  | 1.99481  | 0.60817  |
| H  | 1.84743  | 1.71104  | -1.80381 |
| H  | 3.17718  | -0.61718 | -1.83079 |
| H  | 2.76174  | -1.79637 | 0.55033  |
| H  | 3.05814  | 0.81948  | 1.38844  |
| H  | 1.68185  | -0.00067 | 2.20944  |

## 1b

|    |          |          |          |
|----|----------|----------|----------|
| C  | -1.15241 | -1.06026 | -0.34656 |
| C  | -0.49034 | 0.17509  | -1.05526 |
| C  | -1.47172 | 1.28143  | -0.75921 |
| C  | -2.58877 | 0.83299  | -0.17635 |
| C  | -2.59087 | -0.66259 | 0.04738  |
| O  | -0.02552 | -1.29314 | 1.90755  |
| C  | -0.11132 | -0.91052 | 0.77766  |
| C  | 0.73322  | 0.07740  | -0.08521 |
| Cl | 2.10214  | -0.84120 | -0.84344 |
| Cl | 1.33128  | 1.55850  | 0.70843  |
| H  | -1.06790 | -2.01899 | -0.86477 |
| H  | -0.21033 | 0.09523  | -2.10855 |
| H  | -1.26908 | 2.31592  | -1.01554 |
| H  | -3.43088 | 1.45977  | 0.10357  |
| H  | -3.33937 | -1.16421 | -0.58067 |
| H  | -2.81298 | -0.93799 | 1.08596  |

## 2-INT

|   |          |          |          |
|---|----------|----------|----------|
| C | -2.33553 | -0.40062 | -0.50209 |
| C | -2.52114 | -0.34225 | 0.94647  |

|   |          |          |          |
|---|----------|----------|----------|
| C | -3.04318 | -1.57008 | 1.39472  |
| C | -3.33907 | -2.35172 | 0.29977  |
| C | -3.24576 | -1.54408 | -0.95915 |
| O | -0.83311 | -2.29634 | -0.49316 |
| C | -0.83128 | -1.05512 | -0.39627 |
| C | 0.22476  | -0.16708 | -0.11381 |
| H | -2.35681 | 0.53164  | -1.05951 |
| H | -2.21353 | 0.48811  | 1.56832  |
| H | -3.11693 | -1.87816 | 2.43150  |
| H | -3.67633 | -3.38195 | 0.33430  |
| H | -4.23755 | -1.14018 | -1.21788 |
| H | -2.86231 | -2.10527 | -1.81165 |
| C | -0.01766 | 1.31218  | -0.07881 |
| C | -0.19025 | 2.04451  | -1.26585 |
| C | -0.03201 | 2.01778  | 1.13645  |
| C | -0.40227 | 3.42415  | -1.23846 |
| H | -0.15338 | 1.52037  | -2.21769 |
| C | -0.23419 | 3.39883  | 1.16725  |
| H | 0.12753  | 1.47138  | 2.06280  |
| C | -0.42659 | 4.10640  | -0.02082 |
| H | -0.53908 | 3.96700  | -2.17034 |
| H | -0.24191 | 3.92143  | 2.12046  |
| H | -0.58717 | 5.18096  | 0.00176  |
| C | 1.62131  | -0.62357 | -0.06543 |
| C | 2.67304  | 0.30831  | 0.11839  |
| C | 1.98568  | -1.99038 | -0.16286 |
| C | 3.99818  | -0.10068 | 0.22857  |
| H | 2.44575  | 1.36622  | 0.18370  |
| C | 3.31277  | -2.39050 | -0.04440 |
| H | 1.21084  | -2.72469 | -0.33733 |
| C | 4.33114  | -1.45445 | 0.15169  |
| H | 4.77585  | 0.64561  | 0.37218  |
| H | 3.55505  | -3.44796 | -0.11963 |
| H | 5.36703  | -1.77347 | 0.23217  |

#### 2-TS1

|   |          |          |          |
|---|----------|----------|----------|
| C | 2.37720  | -0.40471 | 0.62111  |
| C | 2.75224  | -0.24174 | -0.72629 |
| C | 3.42513  | -1.41603 | -1.18454 |
| C | 3.58580  | -2.26897 | -0.13195 |
| C | 3.13269  | -1.61588 | 1.13806  |
| O | 0.80119  | -2.36773 | 0.08327  |
| C | 0.68815  | -1.15761 | 0.13690  |
| C | -0.29338 | -0.19751 | 0.01071  |
| H | 2.14593  | 0.43858  | 1.26036  |
| H | 2.51543  | 0.62419  | -1.33162 |
| H | 3.70516  | -1.60951 | -2.21363 |
| H | 4.01039  | -3.26564 | -0.17912 |
| H | 4.00611  | -1.26354 | 1.71077  |
| H | 2.55244  | -2.27635 | 1.78534  |
| C | -0.00372 | 1.27067  | 0.02607  |
| C | -0.00079 | 1.99575  | 1.23036  |
| C | 0.21121  | 1.97781  | -1.16820 |
| C | 0.24337  | 3.37011  | 1.24435  |
| H | -0.19543 | 1.46863  | 2.16117  |
| C | 0.45008  | 3.35408  | -1.15968 |
| H | 0.17779  | 1.43650  | -2.11033 |
| C | 0.47259  | 4.05330  | 0.04817  |

|   |          |          |          |
|---|----------|----------|----------|
| H | 0.24813  | 3.90836  | 2.18882  |
| H | 0.61459  | 3.87970  | -2.09694 |
| H | 0.65940  | 5.12390  | 0.05707  |
| C | -1.71057 | -0.62548 | -0.00874 |
| C | -2.74025 | 0.33846  | -0.10669 |
| C | -2.10478 | -1.98233 | 0.04813  |
| C | -4.08160 | -0.03290 | -0.15874 |
| H | -2.48562 | 1.39149  | -0.15250 |
| C | -3.44756 | -2.34509 | -0.00582 |
| H | -1.34858 | -2.75250 | 0.13624  |
| C | -4.44969 | -1.37777 | -0.10908 |
| H | -4.84322 | 0.73930  | -0.23868 |
| H | -3.71216 | -3.39901 | 0.03907  |
| H | -5.49655 | -1.66704 | -0.14700 |

2-TS2A

|   |          |          |          |
|---|----------|----------|----------|
| C | -2.33375 | -0.39255 | -0.47292 |
| C | -2.62487 | -0.39983 | 0.96696  |
| C | -3.04083 | -1.67914 | 1.33731  |
| C | -3.14701 | -2.45029 | 0.18501  |
| C | -3.16428 | -1.56014 | -1.01996 |
| O | -0.85056 | -2.27990 | -0.39948 |
| C | -0.83637 | -1.02303 | -0.34140 |
| C | 0.22315  | -0.14549 | -0.10379 |
| H | -2.36304 | 0.56084  | -0.99380 |
| H | -2.40862 | 0.42535  | 1.63398  |
| H | -3.13420 | -2.04519 | 2.35325  |
| H | -3.34647 | -3.51555 | 0.15731  |
| H | -4.19125 | -1.21777 | -1.21994 |
| H | -2.75835 | -2.02182 | -1.91960 |
| C | -0.02511 | 1.33378  | -0.07903 |
| C | -0.10265 | 2.07408  | -1.27101 |
| C | -0.15308 | 2.02715  | 1.13600  |
| C | -0.33021 | 3.45122  | -1.25096 |
| H | 0.01718  | 1.55718  | -2.21988 |
| C | -0.37156 | 3.40631  | 1.16051  |
| H | -0.06768 | 1.47363  | 2.06779  |
| C | -0.46685 | 4.12210  | -0.03404 |
| H | -0.39375 | 4.00128  | -2.18650 |
| H | -0.46727 | 3.92068  | 2.11347  |
| H | -0.64003 | 5.19487  | -0.01695 |
| C | 1.62035  | -0.60415 | -0.05196 |
| C | 2.66539  | 0.32090  | 0.18650  |
| C | 1.98848  | -1.96324 | -0.20516 |
| C | 3.99072  | -0.08958 | 0.29416  |
| H | 2.43225  | 1.37385  | 0.29930  |
| C | 3.31568  | -2.36587 | -0.09003 |
| H | 1.21864  | -2.69268 | -0.41952 |
| C | 4.32888  | -1.43744 | 0.15988  |
| H | 4.76417  | 0.65126  | 0.48237  |
| H | 3.56167  | -3.41833 | -0.21057 |
| H | 5.36463  | -1.75735 | 0.23862  |

2-TS2B

|   |          |          |          |
|---|----------|----------|----------|
| C | -2.33567 | -0.67612 | -0.33144 |
| C | -1.93542 | -0.74414 | 1.10036  |
| C | -2.10609 | -2.08029 | 1.54974  |
| C | -2.73336 | -2.81423 | 0.58067  |

|   |          |          |          |
|---|----------|----------|----------|
| C | -3.17470 | -1.94037 | -0.56248 |
| O | -0.61672 | -2.11504 | -1.23736 |
| C | -0.84565 | -0.99179 | -0.77396 |
| C | 0.13361  | -0.06217 | -0.25937 |
| H | -2.75173 | 0.26159  | -0.69013 |
| H | -1.65585 | 0.10254  | 1.71035  |
| H | -1.75361 | -2.46138 | 2.50208  |
| H | -2.94374 | -3.87732 | 0.63864  |
| H | -4.24907 | -1.71556 | -0.47782 |
| H | -2.99103 | -2.39409 | -1.53880 |
| C | -0.22577 | 1.37557  | -0.11020 |
| C | -0.86044 | 2.07537  | -1.15254 |
| C | 0.07855  | 2.08757  | 1.06689  |
| C | -1.19895 | 3.42250  | -1.01667 |
| H | -1.07152 | 1.55731  | -2.08425 |
| C | -0.25767 | 3.43297  | 1.20306  |
| H | 0.58189  | 1.57074  | 1.87993  |
| C | -0.90231 | 4.10705  | 0.16245  |
| H | -1.68568 | 3.93939  | -1.83978 |
| H | -0.01780 | 3.95618  | 2.12518  |
| H | -1.16375 | 5.15638  | 0.26833  |
| C | 1.55873  | -0.42884 | -0.18008 |
| C | 2.57058  | 0.55783  | -0.19127 |
| C | 1.96837  | -1.77697 | -0.03637 |
| C | 3.91485  | 0.22170  | -0.04813 |
| H | 2.30026  | 1.59933  | -0.32487 |
| C | 3.30965  | -2.10484 | 0.11917  |
| H | 1.21922  | -2.55687 | -0.06623 |
| C | 4.29392  | -1.11089 | 0.11409  |
| H | 4.66769  | 1.00564  | -0.06899 |
| H | 3.59273  | -3.14788 | 0.23704  |
| H | 5.34240  | -1.37500 | 0.22483  |

2a

|   |          |          |          |
|---|----------|----------|----------|
| C | -2.44324 | 0.44104  | -0.14089 |
| C | -3.10315 | 0.02611  | 1.17745  |
| C | -3.49861 | -1.24786 | 1.04366  |
| C | -3.07746 | -1.66305 | -0.35616 |
| C | -3.31228 | -0.36924 | -1.14618 |
| O | -1.59653 | -1.71483 | -0.35722 |
| C | -1.17300 | -0.41427 | -0.20513 |
| C | 0.12675  | -0.05245 | -0.09868 |
| H | -2.30541 | 1.50563  | -0.30917 |
| H | -3.11876 | 0.64123  | 2.07048  |
| H | -3.91195 | -1.90731 | 1.79820  |
| H | -3.42894 | -2.61379 | -0.75266 |
| H | -4.35551 | -0.04688 | -1.16087 |
| H | -2.90196 | -0.40754 | -2.16036 |
| C | 0.46118  | 1.40408  | -0.00533 |
| C | 0.15160  | 2.29892  | -1.04217 |
| C | 1.11826  | 1.90962  | 1.12975  |
| C | 0.46176  | 3.65684  | -0.93907 |
| H | -0.32591 | 1.91894  | -1.94179 |
| C | 1.43235  | 3.26378  | 1.23370  |
| H | 1.37924  | 1.22856  | 1.93529  |
| C | 1.10153  | 4.14471  | 0.20066  |
| H | 0.21215  | 4.33018  | -1.75530 |
| H | 1.93394  | 3.63350  | 2.12453  |

|   |         |          |          |
|---|---------|----------|----------|
| H | 1.34717 | 5.20031  | 0.28154  |
| C | 1.25562 | -1.02136 | -0.07818 |
| C | 2.52027 | -0.63214 | -0.56113 |
| C | 1.12525 | -2.32896 | 0.42978  |
| C | 3.60246 | -1.51027 | -0.54796 |
| H | 2.65283 | 0.37050  | -0.95558 |
| C | 2.21005 | -3.20322 | 0.44661  |
| H | 0.16671 | -2.65794 | 0.81142  |
| C | 3.45490 | -2.80271 | -0.04302 |
| H | 4.56389 | -1.18119 | -0.93463 |
| H | 2.08107 | -4.20475 | 0.85004  |
| H | 4.29820 | -3.48829 | -0.02962 |

2b

|   |          |          |          |
|---|----------|----------|----------|
| C | -0.74515 | -2.46961 | 0.08596  |
| C | -0.66398 | -1.38328 | -1.03717 |
| C | -2.11728 | -1.19028 | -1.39491 |
| C | -2.92269 | -2.06456 | -0.78167 |
| C | -2.18169 | -3.03159 | 0.11648  |
| O | -0.56767 | -1.27756 | 2.28765  |
| C | -0.45024 | -1.35112 | 1.08843  |
| C | -0.04390 | -0.33500 | -0.01384 |
| H | 0.04044  | -3.23157 | 0.07888  |
| H | -0.03615 | -1.60257 | -1.90482 |
| H | -2.45247 | -0.41825 | -2.08035 |
| H | -4.00129 | -2.10410 | -0.90918 |
| H | -2.23211 | -4.06041 | -0.26650 |
| H | -2.58121 | -3.05612 | 1.13864  |
| C | -0.66233 | 1.05896  | 0.03214  |
| C | -0.70734 | 1.83431  | -1.13644 |
| C | -1.16863 | 1.60369  | 1.21851  |
| C | -1.25280 | 3.11669  | -1.12353 |
| H | -0.30605 | 1.43331  | -2.06408 |
| C | -1.71346 | 2.89037  | 1.23116  |
| H | -1.13733 | 1.01977  | 2.13183  |
| C | -1.75971 | 3.65082  | 0.06357  |
| H | -1.27986 | 3.69992  | -2.04050 |
| H | -2.10343 | 3.29596  | 2.16127  |
| H | -2.18409 | 4.65121  | 0.07625  |
| C | 1.48916  | -0.23627 | -0.07834 |
| C | 2.18052  | -0.24232 | -1.29722 |
| C | 2.22458  | -0.07732 | 1.10587  |
| C | 3.56847  | -0.09660 | -1.33250 |
| H | 1.63932  | -0.35265 | -2.23237 |
| C | 3.61162  | 0.06415  | 1.07110  |
| H | 1.70528  | -0.06875 | 2.05941  |
| C | 4.29040  | 0.05428  | -0.14846 |
| H | 4.08395  | -0.10247 | -2.28945 |
| H | 4.16181  | 0.18134  | 2.00106  |
| H | 5.37115  | 0.16387  | -0.17598 |

3-INT

|   |          |          |          |
|---|----------|----------|----------|
| C | 1.54834  | 0.17486  | 0.15990  |
| C | 0.25660  | -0.25009 | -0.48419 |
| C | -0.74651 | -0.91793 | 0.18281  |
| B | -1.22569 | 0.88492  | 0.08238  |
| H | 1.92824  | 1.10597  | -0.26937 |
| H | 2.30189  | -0.60699 | -0.00346 |



|   |          |          |          |
|---|----------|----------|----------|
| H | 0.23196  | -0.23919 | -1.57125 |
| H | -0.64276 | -1.14994 | 1.23774  |
| H | -1.49792 | -1.47861 | -0.36012 |
| H | -0.52933 | 1.61339  | -0.59688 |
| H | -1.15656 | 1.21385  | 1.23432  |
| H | -2.28319 | 0.76505  | -0.47225 |
| H | 1.42551  | 0.31082  | 1.23824  |

### 3-TS1-eclipsed

|   |          |          |          |
|---|----------|----------|----------|
| C | -1.80473 | -0.70918 | 0.17011  |
| C | -0.83902 | 0.25244  | -0.46055 |
| C | -0.08269 | 1.13362  | 0.20133  |
| B | 2.85190  | -0.55013 | 0.01663  |
| H | -2.82703 | -0.53046 | -0.18971 |
| H | -1.55778 | -1.74689 | -0.09022 |
| H | -0.77654 | 0.22038  | -1.54920 |
| H | -0.11673 | 1.21331  | 1.28639  |
| H | 0.57889  | 1.82226  | -0.31666 |
| H | 2.54939  | -1.43847 | -0.72154 |
| H | 2.79653  | -0.71054 | 1.19842  |
| H | 3.25899  | 0.48101  | -0.42746 |
| H | -1.80659 | -0.62117 | 1.26149  |

### 3-TS1-staggered

|   |          |          |          |
|---|----------|----------|----------|
| C | 1.72468  | -0.77044 | -0.15862 |
| C | 0.87233  | 0.30516  | 0.44974  |
| C | 0.10301  | 1.15898  | -0.23316 |
| B | -2.81126 | -0.55205 | 0.01251  |
| H | 2.78301  | -0.62413 | 0.09625  |
| H | 1.44423  | -1.76085 | 0.22340  |
| H | 0.90295  | 0.38088  | 1.53764  |
| H | 0.04651  | 1.13218  | -1.31964 |
| H | -0.47932 | 1.92910  | 0.26556  |
| H | -2.39628 | -1.62568 | -0.30466 |
| H | -3.12370 | 0.23840  | -0.82632 |
| H | -2.95622 | -0.28511 | 1.16725  |
| H | 1.63497  | -0.78677 | -1.24975 |

### 3-TS2A

|   |          |          |          |
|---|----------|----------|----------|
| C | 1.55891  | 0.14310  | 0.15932  |
| C | 0.23867  | -0.18404 | -0.49063 |
| C | -0.78177 | -0.87523 | 0.17572  |
| B | -1.22681 | 0.82241  | 0.11177  |
| H | 2.02756  | 1.02730  | -0.28245 |
| H | 2.23860  | -0.70829 | 0.02536  |
| H | 0.22860  | -0.18536 | -1.57829 |
| H | -0.62356 | -1.18436 | 1.20418  |
| H | -1.49012 | -1.46835 | -0.39133 |
| H | -2.21278 | 0.87965  | -0.56689 |
| H | -0.39011 | 1.48555  | -0.50810 |
| H | -1.17272 | 1.22675  | 1.23938  |
| H | 1.43372  | 0.31213  | 1.23286  |

### 3-TS2B

|   |          |          |          |
|---|----------|----------|----------|
| C | 1.56238  | 0.09333  | -0.14405 |
| C | 0.20242  | -0.12394 | 0.48860  |
| C | -0.80087 | -0.88675 | -0.13936 |
| B | -1.06991 | 0.92365  | -0.08425 |

|   |          |          |          |
|---|----------|----------|----------|
| H | 2.26672  | -0.68795 | 0.17171  |
| H | 1.98355  | 1.06100  | 0.14622  |
| H | 0.18682  | -0.11031 | 1.57530  |
| H | -0.65124 | -1.26215 | -1.14848 |
| H | -1.55014 | -1.41393 | 0.44317  |
| H | -1.63793 | 1.36885  | 0.87006  |
| H | -1.93981 | 0.26133  | -0.68021 |
| H | -0.59098 | 1.59598  | -0.95073 |
| H | 1.49898  | 0.07310  | -1.23693 |

3a

|   |          |          |          |
|---|----------|----------|----------|
| C | 1.83659  | 0.07913  | 0.00006  |
| C | 0.42407  | -0.51658 | -0.02527 |
| C | -0.68502 | 0.57774  | 0.02705  |
| B | -2.07469 | -0.14193 | -0.00429 |
| H | 2.59933  | -0.70768 | -0.03743 |
| H | 2.00007  | 0.66370  | 0.91323  |
| H | 0.30451  | -1.20408 | 0.82253  |
| H | -0.53573 | 1.26111  | -0.81908 |
| H | -0.54169 | 1.15409  | 0.95192  |
| H | 0.30639  | -1.12410 | -0.93277 |
| H | -2.67373 | -0.30807 | -1.02961 |
| H | -2.53783 | -0.61271 | 0.99704  |
| H | 1.99825  | 0.74566  | -0.85539 |

3b

|   |          |          |          |
|---|----------|----------|----------|
| C | 1.46155  | 0.03203  | 0.07948  |
| C | 0.00251  | 0.09660  | -0.39949 |
| C | -0.80599 | -1.12397 | 0.13791  |
| B | -0.82059 | 1.33007  | 0.10164  |
| H | 1.94963  | -0.89807 | -0.24103 |
| H | 2.05248  | 0.86699  | -0.31539 |
| H | -0.02267 | 0.02923  | -1.49667 |
| H | -0.32120 | -2.05691 | -0.17633 |
| H | -1.83522 | -1.14093 | -0.23876 |
| H | -1.76523 | 1.73404  | -0.51611 |
| H | -0.57605 | 1.83956  | 1.16032  |
| H | -0.84619 | -1.13142 | 1.23433  |
| H | 1.51898  | 0.07917  | 1.17403  |

4-INT

|   |          |          |          |
|---|----------|----------|----------|
| O | 1.29526  | -0.97698 | -0.48859 |
| O | 2.00165  | 0.19635  | -0.08107 |
| C | 0.94925  | 1.13993  | 0.04563  |
| C | -0.26881 | 0.29137  | 0.49084  |
| O | 0.24142  | -1.03190 | 0.50445  |
| O | -1.29169 | 0.50838  | -0.41835 |
| C | -2.49528 | -0.17830 | -0.10712 |
| H | -0.60363 | 0.46703  | 1.52324  |
| H | -3.22845 | 0.11354  | -0.86076 |
| H | -2.86845 | 0.10571  | 0.88789  |
| H | -2.35273 | -1.26411 | -0.13738 |
| H | 1.26441  | 1.87559  | 0.78782  |
| H | 0.70467  | 1.61736  | -0.90844 |

4-TS1

|   |         |          |          |
|---|---------|----------|----------|
| O | 1.29500 | -0.94203 | -0.40612 |
| O | 2.01021 | 0.12015  | -0.37716 |

|   |          |          |          |
|---|----------|----------|----------|
| C | 0.45221  | 1.66506  | 0.15966  |
| C | -0.59297 | 0.85046  | 0.46803  |
| O | 0.73902  | -1.21621 | 0.73032  |
| O | -1.39605 | 0.40215  | -0.50241 |
| C | -2.27165 | -0.65931 | -0.12937 |
| H | -0.85523 | 0.59196  | 1.48929  |
| H | -2.87972 | -0.88520 | -1.00555 |
| H | -2.92188 | -0.35685 | 0.70056  |
| H | -1.67955 | -1.53291 | 0.16426  |
| H | 1.05107  | 2.09059  | 0.95082  |
| H | 0.57430  | 2.04267  | -0.84631 |

4-TS2A

|   |          |          |          |
|---|----------|----------|----------|
| O | 0.05173  | -0.37773 | 1.29625  |
| O | 1.58310  | -1.00025 | 0.10670  |
| O | 1.25541  | -0.19238 | -0.88094 |
| C | 1.02912  | 1.04357  | -0.38303 |
| C | -0.33984 | 0.65310  | 0.65716  |
| O | -1.47130 | 0.61125  | -0.15699 |
| C | -1.91668 | -0.69306 | -0.51482 |
| H | -0.37601 | 1.60283  | 1.21903  |
| H | -1.17986 | -1.20960 | -1.14127 |
| H | -2.83878 | -0.54873 | -1.08038 |
| H | -2.10969 | -1.30566 | 0.37096  |
| H | 1.78442  | 1.37998  | 0.32594  |
| H | 0.73279  | 1.73250  | -1.17034 |

4-TS2B

|   |          |          |          |
|---|----------|----------|----------|
| O | 0.15007  | -1.05167 | -0.16266 |
| O | 1.45916  | -1.24698 | -0.02673 |
| O | 1.94761  | 0.68897  | -0.32137 |
| C | 0.86073  | 1.28737  | -0.05284 |
| C | -0.25448 | -0.07036 | 0.66073  |
| O | -1.55667 | 0.22462  | 0.64103  |
| C | -2.25375 | 0.04741  | -0.60112 |
| H | 0.16266  | -0.10808 | 1.66425  |
| H | -1.71165 | 0.52029  | -1.42528 |
| H | -3.22375 | 0.52472  | -0.46560 |
| H | -2.38411 | -1.01640 | -0.81744 |
| H | 0.81568  | 1.92914  | 0.84475  |
| H | 0.22484  | 1.64426  | -0.88338 |

4a+4b

|   |          |          |          |
|---|----------|----------|----------|
| O | -1.94778 | 1.22389  | -0.13311 |
| O | -2.09503 | -0.07824 | -0.47878 |
| C | -1.83164 | -0.95982 | 0.37295  |
| C | 1.70528  | -0.83437 | -0.34846 |
| O | 0.86564  | -1.33730 | 0.35834  |
| O | 2.02736  | 0.45043  | -0.40377 |
| C | 1.28582  | 1.34036  | 0.46028  |
| H | 2.33773  | -1.39461 | -1.05381 |
| H | 0.23203  | 1.37970  | 0.16309  |
| H | 1.75852  | 2.31441  | 0.33948  |
| H | 1.36474  | 1.00379  | 1.49681  |
| H | -1.50602 | -0.66633 | 1.36387  |
| H | -1.94524 | -1.98432 | 0.04042  |

4c+4d

|   |          |          |          |
|---|----------|----------|----------|
| O | -1.73787 | -0.54173 | -0.36362 |
| O | -0.41328 | 0.89907  | 0.71487  |
| C | -1.42217 | 0.82696  | -0.26827 |
| C | 0.23799  | -0.35656 | 0.71710  |
| O | -0.41106 | -1.11088 | -0.31828 |
| O | 1.57826  | -0.31288 | 0.47130  |
| C | 1.98567  | 0.38331  | -0.70952 |
| H | 0.11368  | -0.83258 | 1.69492  |
| H | 1.59129  | -0.09660 | -1.60953 |
| H | 3.07517  | 0.33855  | -0.71816 |
| H | 1.66300  | 1.42850  | -0.67386 |
| H | -2.32037 | 1.35315  | 0.06714  |
| H | -1.06014 | 1.21806  | -1.23053 |

5-INT

|   |          |          |          |
|---|----------|----------|----------|
| C | -2.50277 | 1.11793  | 0.03099  |
| C | -1.39501 | 0.22474  | 0.64604  |
| O | -0.20136 | 0.53381  | 0.01801  |
| C | 0.93322  | -0.16710 | 0.52723  |
| C | 2.16891  | 0.31560  | -0.21611 |
| O | -3.48083 | 0.19623  | -0.42434 |
| O | -2.67645 | -0.92956 | -0.78385 |
| O | -1.86880 | -1.09237 | 0.40714  |
| H | -1.30489 | 0.28812  | 1.73986  |
| H | -2.99016 | 1.77167  | 0.75665  |
| H | -2.06305 | 1.69331  | -0.78978 |
| H | 0.79136  | -1.24724 | 0.39155  |
| H | 1.02822  | 0.02359  | 1.60902  |
| C | 3.44976  | -0.37947 | 0.25758  |
| H | 2.25866  | 1.40110  | -0.08535 |
| H | 2.02111  | 0.14136  | -1.28874 |
| C | 4.69615  | 0.09901  | -0.49178 |
| H | 3.34232  | -1.46500 | 0.13380  |
| H | 3.58196  | -0.20835 | 1.33417  |
| H | 5.59552  | -0.41209 | -0.13511 |
| H | 4.60809  | -0.09137 | -1.56694 |
| H | 4.84892  | 1.17562  | -0.35855 |

5-TS1

|   |          |          |          |
|---|----------|----------|----------|
| C | -2.53799 | 1.39987  | -0.26676 |
| C | -1.39230 | 1.15794  | 0.42538  |
| O | -0.24852 | 0.94710  | -0.23033 |
| C | 0.83796  | 0.43612  | 0.55594  |
| C | 2.05352  | 0.28591  | -0.34203 |
| O | -3.18002 | -0.73252 | -0.71130 |
| O | -2.14553 | -1.37972 | -0.32289 |
| O | -1.88582 | -1.22645 | 0.93555  |
| H | -1.34638 | 1.18474  | 1.50976  |
| H | -3.44619 | 1.63817  | 0.26627  |
| H | -2.51252 | 1.53680  | -1.33915 |
| H | 0.52158  | -0.52553 | 0.97998  |
| H | 1.04016  | 1.12940  | 1.38483  |
| C | 3.26820  | -0.26441 | 0.41386  |
| H | 2.29447  | 1.26086  | -0.78306 |
| H | 1.79472  | -0.38028 | -1.17360 |
| C | 4.49826  | -0.42775 | -0.48279 |
| H | 3.00995  | -1.23242 | 0.86232  |
| H | 3.51128  | 0.40354  | 1.25079  |

|   |         |          |          |
|---|---------|----------|----------|
| H | 5.35008 | -0.82111 | 0.07997  |
| H | 4.79998 | 0.53068  | -0.91917 |
| H | 4.29609 | -1.11815 | -1.30878 |

#### 5-TS2A

|   |          |          |          |
|---|----------|----------|----------|
| C | -2.81229 | -0.50176 | -0.14935 |
| C | -1.30013 | -0.72477 | 0.72527  |
| O | -0.40963 | -1.34605 | -0.14690 |
| C | 0.60001  | -0.51220 | -0.73230 |
| C | 1.85164  | -0.42835 | 0.13833  |
| O | -2.47499 | 0.60984  | -0.84046 |
| O | -2.23095 | 1.58658  | 0.01086  |
| O | -1.06255 | 0.43347  | 1.20628  |
| H | -1.65650 | -1.48861 | 1.43886  |
| H | -2.99708 | -1.33622 | -0.82155 |
| H | -3.53331 | -0.32573 | 0.64792  |
| H | 0.19726  | 0.48791  | -0.92038 |
| H | 0.83090  | -0.97836 | -1.69580 |
| C | 2.97172  | 0.37514  | -0.53164 |
| H | 2.19745  | -1.44682 | 0.35605  |
| H | 1.58486  | 0.03183  | 1.09615  |
| C | 4.23657  | 0.46262  | 0.32678  |
| H | 2.60966  | 1.38757  | -0.75313 |
| H | 3.21821  | -0.07853 | -1.50118 |
| H | 5.01880  | 1.04243  | -0.17299 |
| H | 4.02766  | 0.94324  | 1.28871  |
| H | 4.64197  | -0.53342 | 0.53661  |

#### 5-TS2B

|   |          |          |          |
|---|----------|----------|----------|
| C | 2.61760  | -0.94350 | -0.00582 |
| C | 1.06450  | -0.09108 | -0.68475 |
| O | -0.02577 | -0.85730 | -0.67360 |
| C | -0.71497 | -1.06648 | 0.58607  |
| C | -1.88581 | -0.10472 | 0.75435  |
| O | 3.40765  | 0.01174  | 0.26626  |
| O | 2.22381  | 1.62928  | 0.02468  |
| O | 1.08383  | 0.95644  | 0.16065  |
| H | 1.42812  | 0.12690  | -1.68644 |
| H | 2.17225  | -1.52558 | 0.82129  |
| H | 2.80008  | -1.54013 | -0.91724 |
| H | -0.00003 | -0.96777 | 1.40765  |
| H | -1.06227 | -2.10255 | 0.53905  |
| C | -2.95306 | -0.23173 | -0.33858 |
| H | -1.50518 | 0.92195  | 0.79766  |
| H | -2.33087 | -0.31147 | 1.73700  |
| C | -4.11834 | 0.74085  | -0.14161 |
| H | -3.33099 | -1.26275 | -0.35581 |
| H | -2.48813 | -0.06094 | -1.31603 |
| H | -4.86531 | 0.63026  | -0.93331 |
| H | -4.62087 | 0.57059  | 0.81705  |
| H | -3.77249 | 1.78022  | -0.15279 |

#### 5a+5b

|   |          |          |          |
|---|----------|----------|----------|
| C | 2.21546  | -1.38826 | 0.86861  |
| C | 1.10204  | 2.23343  | 0.28527  |
| O | 0.14723  | 2.22972  | -0.63497 |
| C | -0.50127 | 0.96175  | -0.93623 |
| C | -1.58166 | 0.62231  | 0.08354  |

|   |          |          |          |
|---|----------|----------|----------|
| O | 2.22885  | -1.77338 | -0.32373 |
| O | 1.05133  | -2.01135 | -0.95005 |
| O | 1.50191  | 1.29495  | 0.93091  |
| H | 1.49632  | 3.25691  | 0.38527  |
| H | 3.18594  | -1.18902 | 1.30717  |
| H | 1.27063  | -1.25988 | 1.38233  |
| H | 0.24765  | 0.16770  | -0.99540 |
| H | -0.93052 | 1.11905  | -1.92835 |
| C | -2.25449 | -0.71744 | -0.24271 |
| H | -2.32480 | 1.42933  | 0.11155  |
| H | -1.12751 | 0.57224  | 1.07985  |
| C | -3.34607 | -1.09193 | 0.76301  |
| H | -1.48394 | -1.49641 | -0.27319 |
| H | -2.68667 | -0.67256 | -1.25121 |
| H | -3.80455 | -2.05297 | 0.51066  |
| H | -2.93920 | -1.17410 | 1.77726  |
| H | -4.14190 | -0.33896 | 0.78789  |

#### 5c+5d

|   |          |          |          |
|---|----------|----------|----------|
| C | 2.71387  | 0.24906  | 0.75079  |
| C | 1.20832  | -0.36963 | -0.82978 |
| O | 0.01683  | -1.01751 | -0.74176 |
| C | -0.59805 | -1.13469 | 0.55794  |
| C | -1.69261 | -0.09469 | 0.77519  |
| O | 2.21996  | -0.86035 | 0.03421  |
| O | 2.38711  | 1.37226  | -0.03682 |
| O | 1.05289  | 1.00770  | -0.45296 |
| H | 1.53936  | -0.45628 | -1.87015 |
| H | 3.80448  | 0.20676  | 0.82737  |
| H | 2.24277  | 0.31179  | 1.74292  |
| H | 0.17008  | -1.07911 | 1.33382  |
| H | -1.01913 | -2.14548 | 0.57718  |
| C | -2.82264 | -0.16789 | -0.25747 |
| H | -1.24152 | 0.90346  | 0.76752  |
| H | -2.10004 | -0.25162 | 1.78386  |
| C | -3.90621 | 0.88841  | -0.02833 |
| H | -3.27255 | -1.16969 | -0.23144 |
| H | -2.39495 | -0.05126 | -1.25921 |
| H | -4.69939 | 0.81507  | -0.77882 |
| H | -4.37020 | 0.77601  | 0.95824  |
| H | -3.48922 | 1.90012  | -0.08272 |

#### 6-INT

|   |          |          |          |
|---|----------|----------|----------|
| C | -4.85208 | 1.05473  | 0.08555  |
| C | -3.74311 | 0.11473  | 0.62390  |
| O | -2.53099 | 0.55591  | 0.12336  |
| C | -1.39727 | -0.17666 | 0.58857  |
| C | -0.14414 | 0.45471  | 0.00218  |
| O | -5.76411 | 0.18230  | -0.56298 |
| O | -4.89465 | -0.84769 | -1.03945 |
| O | -4.14767 | -1.16497 | 0.15985  |
| H | -3.71578 | 0.01198  | 1.71810  |
| H | -5.40560 | 1.57232  | 0.87119  |
| H | -4.39260 | 1.76399  | -0.61007 |
| H | -1.48624 | -1.22740 | 0.28332  |
| H | -1.36959 | -0.15046 | 1.69044  |
| C | 1.13634  | -0.26231 | 0.44273  |
| H | -0.22650 | 0.44125  | -1.09124 |

|   |          |          |          |
|---|----------|----------|----------|
| H | -0.10799 | 1.50974  | 0.30021  |
| C | 2.40732  | 0.35905  | -0.14677 |
| H | 1.20382  | -0.25297 | 1.53960  |
| H | 1.08174  | -1.32046 | 0.15197  |
| C | 3.69217  | -0.35288 | 0.28939  |
| H | 2.33979  | 0.34932  | -1.24338 |
| H | 2.46122  | 1.41767  | 0.14281  |
| C | 4.96387  | 0.26634  | -0.29977 |
| H | 3.75818  | -0.34333 | 1.38648  |
| H | 3.63632  | -1.41178 | 0.00040  |
| C | 6.24971  | -0.44474 | 0.13561  |
| H | 4.89833  | 0.25691  | -1.39692 |
| H | 5.02014  | 1.32554  | -0.01134 |
| C | 7.51534  | 0.18005  | -0.45763 |
| H | 6.31488  | -0.43457 | 1.23184  |
| H | 6.19303  | -1.50274 | -0.15320 |
| H | 8.41549  | -0.34883 | -0.12891 |
| H | 7.49450  | 0.15239  | -1.55288 |
| H | 7.61734  | 1.22894  | -0.15726 |

#### 6-TS1

|   |          |          |          |
|---|----------|----------|----------|
| C | 4.95119  | -1.09325 | -0.39644 |
| C | 3.80427  | -1.05525 | 0.33382  |
| O | 2.62254  | -0.98443 | -0.28326 |
| C | 1.49715  | -0.67721 | 0.55320  |
| C | 0.24645  | -0.66260 | -0.30837 |
| O | 5.25799  | 1.12979  | -0.74976 |
| O | 4.15279  | 1.59765  | -0.30306 |
| O | 3.95967  | 1.35004  | 0.95230  |
| H | 3.79608  | -1.13868 | 1.41628  |
| H | 5.90050  | -1.21915 | 0.10229  |
| H | 4.91306  | -1.18258 | -1.47347 |
| H | 1.68328  | 0.29841  | 1.02025  |
| H | 1.42266  | -1.43256 | 1.34842  |
| C | -1.01171 | -0.33421 | 0.50311  |
| H | 0.13740  | -1.63944 | -0.79497 |
| H | 0.38177  | 0.07457  | -1.10859 |
| C | -2.28477 | -0.30508 | -0.34978 |
| H | -0.88403 | 0.63799  | 0.99844  |
| H | -1.13200 | -1.07176 | 1.30883  |
| C | -3.54785 | 0.02181  | 0.45375  |
| H | -2.41036 | -1.27694 | -0.84686 |
| H | -2.16394 | 0.43263  | -1.15490 |
| C | -4.82169 | 0.05211  | -0.39725 |
| H | -3.42011 | 0.99335  | 0.95132  |
| H | -3.66677 | -0.71607 | 1.25961  |
| C | -6.08603 | 0.37881  | 0.40480  |
| H | -4.94953 | -0.91926 | -0.89555 |
| H | -4.70310 | 0.78995  | -1.20323 |
| C | -7.35399 | 0.40704  | -0.45285 |
| H | -5.95779 | 1.34962  | 0.90183  |
| H | -6.20403 | -0.35884 | 1.20977  |
| H | -8.23852 | 0.64280  | 0.14717  |
| H | -7.52753 | -0.56154 | -0.93507 |
| H | -7.27918 | 1.16009  | -1.24535 |

#### 6-TS2A

|   |         |          |         |
|---|---------|----------|---------|
| C | 4.73281 | -0.06320 | 1.05621 |
|---|---------|----------|---------|

|   |          |          |          |
|---|----------|----------|----------|
| C | 3.92350  | -0.87001 | -0.28431 |
| O | 2.62958  | -1.16534 | 0.13807  |
| C | 1.59963  | -0.29949 | -0.34869 |
| C | 0.26814  | -0.83138 | 0.15930  |
| O | 4.23329  | 1.17876  | 0.86880  |
| O | 4.62848  | 1.62741  | -0.30568 |
| O | 4.13673  | -0.09463 | -1.27443 |
| H | 4.50101  | -1.81118 | -0.26081 |
| H | 4.40684  | -0.47434 | 2.00862  |
| H | 5.78669  | -0.15920 | 0.79839  |
| H | 1.62816  | -0.27037 | -1.44451 |
| H | 1.77585  | 0.72473  | 0.00702  |
| C | -0.91749 | 0.01857  | -0.30976 |
| H | 0.29361  | -0.86787 | 1.25557  |
| H | 0.14792  | -1.86640 | -0.18371 |
| C | -2.26831 | -0.50148 | 0.19378  |
| H | -0.78019 | 1.05587  | 0.02565  |
| H | -0.92926 | 0.05550  | -1.40777 |
| C | -3.45910 | 0.34232  | -0.27316 |
| H | -2.40451 | -1.53942 | -0.14042 |
| H | -2.25635 | -0.53763 | 1.29206  |
| C | -4.81034 | -0.17586 | 0.23023  |
| H | -3.32121 | 1.38054  | 0.06005  |
| H | -3.47009 | 0.37793  | -1.37157 |
| C | -6.00223 | 0.66671  | -0.23672 |
| H | -4.94854 | -1.21441 | -0.10234 |
| H | -4.80008 | -0.21127 | 1.32885  |
| C | -7.34813 | 0.14230  | 0.27093  |
| H | -5.86382 | 1.70410  | 0.09596  |
| H | -6.01250 | 0.70107  | -1.33430 |
| H | -8.17847 | 0.76387  | -0.07878 |
| H | -7.53018 | -0.88140 | -0.07511 |
| H | -7.38046 | 0.12951  | 1.36621  |

#### 6-TS2B

|   |          |          |          |
|---|----------|----------|----------|
| C | 4.31908  | 1.44540  | 0.10233  |
| C | 3.78592  | -0.29137 | 0.62855  |
| O | 2.52568  | -0.37232 | 1.05641  |
| C | 1.47638  | -0.42604 | 0.06244  |
| C | 0.15410  | -0.18696 | 0.77014  |
| O | 5.34436  | 1.25404  | -0.62281 |
| O | 5.35565  | -0.75048 | -0.82793 |
| O | 4.06554  | -0.89936 | -0.53884 |
| H | 4.52037  | -0.45221 | 1.41470  |
| H | 3.38617  | 1.80108  | -0.37159 |
| H | 4.46091  | 1.81963  | 1.13168  |
| H | 1.50347  | -1.40956 | -0.41991 |
| H | 1.66905  | 0.33073  | -0.70676 |
| C | -1.03680 | -0.26349 | -0.19223 |
| H | 0.18434  | 0.79513  | 1.25693  |
| H | 0.04216  | -0.93064 | 1.56812  |
| C | -2.38277 | -0.02784 | 0.50210  |
| H | -0.90811 | 0.47526  | -0.99517 |
| H | -1.04832 | -1.24619 | -0.68321 |
| C | -3.57943 | -0.10280 | -0.45197 |
| H | -2.50989 | -0.76649 | 1.30545  |
| H | -2.36954 | 0.95454  | 0.99394  |
| C | -4.92628 | 0.13218  | 0.23981  |



|   |          |          |          |
|---|----------|----------|----------|
| H | -3.44982 | 0.63555  | -1.25557 |
| H | -3.59015 | -1.08530 | -0.94426 |
| C | -6.12437 | 0.05757  | -0.71288 |
| H | -5.05595 | -0.60600 | 1.04380  |
| H | -4.91564 | 1.11462  | 0.73257  |
| C | -7.46601 | 0.29324  | -0.01400 |
| H | -5.99423 | 0.79561  | -1.51555 |
| H | -6.13435 | -0.92428 | -1.20461 |
| H | -8.30079 | 0.23371  | -0.71930 |
| H | -7.63985 | -0.45137 | 0.77090  |
| H | -7.49866 | 1.28186  | 0.45748  |

6a+6b

|   |          |          |          |
|---|----------|----------|----------|
| C | -4.16004 | 2.28556  | -0.50345 |
| C | -3.68858 | -2.13681 | -0.40133 |
| O | -3.32703 | -0.90749 | -0.00924 |
| C | -2.08770 | -0.79250 | 0.74991  |
| C | -0.88781 | -0.64904 | -0.17492 |
| O | -3.23056 | 3.03066  | -0.09580 |
| O | -2.11637 | 2.48469  | 0.41477  |
| O | -3.10019 | -3.15900 | -0.18269 |
| H | -4.63445 | -2.06312 | -0.96231 |
| H | -5.02145 | 2.81124  | -0.89935 |
| H | -4.05226 | 1.20499  | -0.43992 |
| H | -2.00065 | -1.67039 | 1.39380  |
| H | -2.22133 | 0.11169  | 1.34478  |
| C | 0.41551  | -0.48340 | 0.61534  |
| H | -1.04637 | 0.23017  | -0.80896 |
| H | -0.82344 | -1.52990 | -0.82399 |
| C | 1.64425  | -0.32133 | -0.28618 |
| H | 0.33042  | 0.39204  | 1.27276  |
| H | 0.55981  | -1.35165 | 1.27321  |
| C | 2.95244  | -0.15389 | 0.49385  |
| H | 1.72530  | -1.19332 | -0.95007 |
| H | 1.49793  | 0.54760  | -0.94220 |
| C | 4.18252  | 0.01103  | -0.40473 |
| H | 2.86891  | 0.71713  | 1.15867  |
| H | 3.09716  | -1.02265 | 1.15145  |
| C | 5.49186  | 0.17859  | 0.37379  |
| H | 4.26612  | -0.85943 | -1.07082 |
| H | 4.03847  | 0.87995  | -1.06231 |
| C | 6.71578  | 0.34324  | -0.53128 |
| H | 5.40796  | 1.04852  | 1.03874  |
| H | 5.63566  | -0.68995 | 1.03034  |
| H | 7.63403  | 0.46062  | 0.05291  |
| H | 6.84567  | -0.52752 | -1.18383 |
| H | 6.61622  | 1.22435  | -1.17518 |

6c+6d

|   |          |          |          |
|---|----------|----------|----------|
| C | -4.69707 | 1.30669  | -0.43140 |
| C | -3.87102 | -0.78202 | -0.14070 |
| O | -2.57337 | -1.19270 | -0.12089 |
| C | -1.56449 | -0.17139 | -0.03133 |
| C | -0.20966 | -0.85986 | -0.08226 |
| O | -4.18059 | 0.19115  | -1.12175 |
| O | -5.23513 | 0.77980  | 0.75848  |
| O | -4.19415 | -0.15687 | 1.11231  |
| H | -4.48308 | -1.67432 | -0.30784 |

|   |          |          |          |
|---|----------|----------|----------|
| H | -5.51758 | 1.75886  | -0.99585 |
| H | -3.90292 | 2.03703  | -0.21692 |
| H | -1.68783 | 0.38693  | 0.90326  |
| H | -1.68299 | 0.52529  | -0.86979 |
| C | 0.95285  | 0.13483  | 0.00310  |
| H | -0.14324 | -1.43920 | -1.01103 |
| H | -0.14954 | -1.58108 | 0.74166  |
| C | 2.32758  | -0.54099 | -0.04578 |
| H | 0.87623  | 0.86009  | -0.81896 |
| H | 0.86869  | 0.71829  | 0.93046  |
| C | 3.49569  | 0.44696  | 0.04010  |
| H | 2.40345  | -1.26694 | 0.77549  |
| H | 2.41146  | -1.12455 | -0.97300 |
| C | 4.87081  | -0.22715 | -0.00881 |
| H | 3.41800  | 1.17345  | -0.78102 |
| H | 3.41014  | 1.03056  | 0.96751  |
| C | 6.04015  | 0.75964  | 0.07742  |
| H | 4.94891  | -0.95407 | 0.81195  |
| H | 4.95697  | -0.81089 | -0.93619 |
| C | 7.41012  | 0.07782  | 0.02789  |
| H | 5.96185  | 1.48538  | -0.74309 |
| H | 5.95379  | 1.34215  | 1.00438  |
| H | 8.22363  | 0.80736  | 0.09140  |
| H | 7.53104  | -0.62838 | 0.85701  |
| H | 7.53919  | -0.48419 | -0.90393 |

#### 7-INT

|   |          |          |          |
|---|----------|----------|----------|
| C | 5.23218  | -1.31116 | 0.15846  |
| C | 4.19077  | -0.27774 | 0.65918  |
| O | 2.96717  | -0.60196 | 0.10061  |
| C | 1.88610  | 0.23201  | 0.52239  |
| C | 0.61784  | -0.27222 | -0.15231 |
| C | -0.67103 | 0.44359  | 0.29404  |
| H | -0.73192 | 0.37089  | 1.39101  |
| C | -1.89658 | -0.29010 | -0.28595 |
| C | -3.25637 | 0.17675  | 0.24927  |
| C | -4.42072 | -0.66567 | -0.28766 |
| C | -5.80773 | -0.30679 | 0.27730  |
| H | -5.74075 | -0.35057 | 1.37460  |
| C | -6.85205 | -1.33916 | -0.16958 |
| O | 6.24815  | -0.52085 | -0.43890 |
| O | 5.49862  | 0.58839  | -0.94041 |
| O | 4.73100  | 0.96322  | 0.22896  |
| H | 4.12417  | -0.18178 | 1.75233  |
| H | 5.70051  | -1.88382 | 0.96111  |
| H | 4.74130  | -1.96944 | -0.56524 |
| H | 2.10596  | 1.27148  | 0.25436  |
| H | 1.78981  | 0.18032  | 1.61984  |
| H | 0.53173  | -1.34429 | 0.06121  |
| H | 0.73791  | -0.17984 | -1.23930 |
| C | -0.65957 | 1.93349  | -0.08328 |
| H | -1.78973 | -1.36309 | -0.07673 |
| H | -1.88400 | -0.19508 | -1.38149 |
| H | -3.41530 | 1.22965  | -0.00720 |
| H | -3.24969 | 0.12573  | 1.34766  |
| H | -4.21838 | -1.72310 | -0.06847 |
| H | -4.45137 | -0.58730 | -1.38448 |
| C | -6.25396 | 1.11014  | -0.11107 |

|   |          |          |          |
|---|----------|----------|----------|
| H | -7.83662 | -1.11946 | 0.25661  |
| H | -6.95740 | -1.34147 | -1.26133 |
| H | -6.57082 | -2.35184 | 0.13836  |
| H | -1.56783 | 2.44066  | 0.25293  |
| H | 0.18701  | 2.46251  | 0.36393  |
| H | -0.59110 | 2.05708  | -1.17096 |
| H | -7.24756 | 1.33148  | 0.29271  |
| H | -5.56930 | 1.87660  | 0.26330  |
| H | -6.30950 | 1.21544  | -1.20163 |

7-TS1

|   |          |          |          |
|---|----------|----------|----------|
| C | -5.43347 | 0.33263  | -0.96162 |
| C | -4.33879 | 0.84171  | -0.33526 |
| O | -3.11762 | 0.57804  | -0.80559 |
| C | -2.02510 | 0.92212  | 0.06150  |
| C | -0.73000 | 0.59173  | -0.66354 |
| C | 0.53598  | 0.76365  | 0.19762  |
| H | 0.40762  | 0.15310  | 1.10420  |
| C | 1.75635  | 0.21096  | -0.56511 |
| C | 3.04827  | 0.10129  | 0.25484  |
| C | 4.19192  | -0.54888 | -0.53450 |
| C | 5.49335  | -0.77315 | 0.25774  |
| H | 5.23791  | -1.34926 | 1.15949  |
| C | 6.48481  | -1.60705 | -0.56544 |
| O | -5.50283 | -1.72922 | -0.00587 |
| O | -4.38870 | -1.73830 | 0.62506  |
| O | -4.30018 | -0.81434 | 1.52653  |
| H | -4.41011 | 1.51333  | 0.51483  |
| H | -6.42120 | 0.60320  | -0.61967 |
| H | -5.33346 | -0.19015 | -1.90296 |
| H | -2.13498 | 0.33833  | 0.98486  |
| H | -2.09752 | 1.98736  | 0.31439  |
| H | -0.65453 | 1.21289  | -1.56543 |
| H | -0.79900 | -0.44782 | -1.00389 |
| C | 0.74036  | 2.22365  | 0.63248  |
| H | 1.93817  | 0.83747  | -1.45053 |
| H | 1.50252  | -0.78594 | -0.94963 |
| H | 2.85213  | -0.49010 | 1.16068  |
| H | 3.35677  | 1.09457  | 0.59826  |
| H | 4.41531  | 0.06190  | -1.42173 |
| H | 3.84598  | -1.51870 | -0.91761 |
| C | 6.14365  | 0.54288  | 0.70821  |
| H | 7.40061  | -1.80881 | 0.00009  |
| H | 6.77229  | -1.07944 | -1.48307 |
| H | 6.05167  | -2.56936 | -0.85818 |
| H | 1.63600  | 2.33745  | 1.24875  |
| H | -0.10174 | 2.59751  | 1.22267  |
| H | 0.85161  | 2.87720  | -0.24149 |
| H | 7.07245  | 0.35230  | 1.25614  |
| H | 5.48925  | 1.12441  | 1.36400  |
| H | 6.39303  | 1.16993  | -0.15677 |

7-TS2A

|   |          |          |          |
|---|----------|----------|----------|
| C | -4.98706 | 0.92496  | -1.07990 |
| C | -4.39512 | -0.63946 | -0.52903 |
| O | -3.06611 | -0.73907 | -0.93390 |
| C | -2.08251 | -0.50565 | 0.08020  |
| C | -0.72027 | -0.79190 | -0.53749 |

|   |          |          |          |
|---|----------|----------|----------|
| C | 0.47283  | -0.47174 | 0.38290  |
| H | 0.37474  | 0.57664  | 0.70410  |
| C | 1.78777  | -0.59100 | -0.41242 |
| C | 3.04384  | -0.09495 | 0.31558  |
| C | 4.29357  | -0.13768 | -0.57327 |
| C | 5.61035  | 0.25209  | 0.12345  |
| H | 5.71991  | -0.39062 | 1.00964  |
| C | 6.80646  | -0.01649 | -0.80021 |
| O | -4.47673 | 1.68873  | -0.08804 |
| O | -5.01288 | 1.31857  | 1.05743  |
| O | -4.71674 | -0.66441 | 0.70519  |
| H | -4.99418 | -1.27216 | -1.20774 |
| H | -4.54826 | 1.18874  | -2.03920 |
| H | -6.06888 | 0.80677  | -1.03442 |
| H | -2.29339 | -1.14485 | 0.94296  |
| H | -2.14478 | 0.53683  | 0.42307  |
| H | -0.63644 | -0.20104 | -1.45763 |
| H | -0.68267 | -1.84618 | -0.84161 |
| C | 0.47919  | -1.35425 | 1.64118  |
| H | 1.68097  | -0.02342 | -1.34688 |
| H | 1.93049  | -1.63938 | -0.71264 |
| H | 3.22609  | -0.70136 | 1.21178  |
| H | 2.86831  | 0.92921  | 0.66901  |
| H | 4.14380  | 0.51643  | -1.44498 |
| H | 4.40097  | -1.15410 | -0.97658 |
| C | 5.61541  | 1.71244  | 0.59774  |
| H | 7.75374  | 0.21869  | -0.30352 |
| H | 6.84243  | -1.06535 | -1.11338 |
| H | 6.74677  | 0.59858  | -1.70643 |
| H | -0.43683 | -1.23615 | 2.22686  |
| H | 0.56722  | -2.41375 | 1.37061  |
| H | 1.31598  | -1.10880 | 2.30069  |
| H | 6.56699  | 1.96454  | 1.07761  |
| H | 5.48069  | 2.39696  | -0.24896 |
| H | 4.81918  | 1.91490  | 1.31979  |

#### 7-TS2B

|   |          |          |          |
|---|----------|----------|----------|
| C | 4.91897  | 0.44925  | 1.22449  |
| C | 4.21399  | -0.84811 | 0.04252  |
| O | 2.92851  | -1.13647 | 0.24723  |
| C | 1.93870  | -0.21831 | -0.27468 |
| C | 0.60977  | -0.56993 | 0.37490  |
| C | -0.59295 | 0.20185  | -0.20164 |
| H | -0.61401 | 0.02345  | -1.28756 |
| C | -1.89871 | -0.36808 | 0.38719  |
| C | -3.18963 | 0.14489  | -0.26377 |
| C | -4.44276 | -0.53951 | 0.29745  |
| C | -5.76845 | -0.13501 | -0.37389 |
| H | -5.65765 | -0.30311 | -1.45547 |
| C | -6.91450 | -1.02665 | 0.12362  |
| O | 5.96555  | 0.87148  | 0.64129  |
| O | 5.82337  | 0.00613  | -1.17284 |
| O | 4.51069  | -0.19679 | -1.09716 |
| H | 4.88511  | -1.66843 | 0.28750  |
| H | 4.04802  | 1.12329  | 1.31715  |
| H | 5.03088  | -0.24540 | 2.07576  |
| H | 1.89651  | -0.33623 | -1.36369 |
| H | 2.25726  | 0.80590  | -0.05852 |

|   |          |          |          |
|---|----------|----------|----------|
| H | 0.68284  | -0.39420 | 1.45572  |
| H | 0.44858  | -1.64606 | 0.24245  |
| C | -0.46624 | 1.71601  | 0.02961  |
| H | -1.92555 | -0.15796 | 1.46629  |
| H | -1.87301 | -1.46222 | 0.29470  |
| H | -3.13972 | -0.02551 | -1.34879 |
| H | -3.27001 | 1.22860  | -0.12719 |
| H | -4.51418 | -0.33998 | 1.37685  |
| H | -4.32095 | -1.62712 | 0.20091  |
| C | -6.10957 | 1.34672  | -0.15984 |
| H | -7.85734 | -0.77700 | -0.37419 |
| H | -6.70684 | -2.08587 | -0.06166 |
| H | -7.06710 | -0.90194 | 1.20257  |
| H | -1.31924 | 2.25746  | -0.38716 |
| H | -0.41909 | 1.94257  | 1.10177  |
| H | 0.43217  | 2.12984  | -0.43827 |
| H | -7.06241 | 1.60081  | -0.63588 |
| H | -6.20342 | 1.57411  | 0.90926  |
| H | -5.34738 | 2.01150  | -0.57654 |

7a+7b

|   |          |          |          |
|---|----------|----------|----------|
| C | -3.88165 | 2.88142  | -0.44255 |
| C | -4.41102 | -1.53165 | -0.69728 |
| O | -3.79721 | -0.44816 | -0.20264 |
| C | -2.61221 | -0.67345 | 0.61787  |
| C | -1.36219 | -0.72209 | -0.25124 |
| C | -0.05251 | -0.79121 | 0.55856  |
| H | -0.05649 | 0.05341  | 1.26303  |
| C | 1.14744  | -0.59586 | -0.38887 |
| C | 2.50758  | -0.43137 | 0.30153  |
| C | 3.63623  | -0.12475 | -0.69132 |
| C | 5.04735  | -0.04708 | -0.07979 |
| H | 5.22643  | -0.98752 | 0.46247  |
| C | 6.10640  | 0.06444  | -1.18528 |
| O | -2.82982 | 3.36246  | 0.05504  |
| O | -1.89412 | 2.54000  | 0.55346  |
| O | -4.09187 | -2.67525 | -0.52642 |
| H | -5.27780 | -1.20303 | -1.29355 |
| H | -4.58186 | 3.61762  | -0.82044 |
| H | -4.02269 | 1.80307  | -0.46604 |
| H | -2.76812 | -1.59264 | 1.18337  |
| H | -2.57862 | 0.19092  | 1.28239  |
| H | -1.35215 | 0.18893  | -0.85879 |
| H | -1.42624 | -1.58087 | -0.93098 |
| C | 0.05609  | -2.09410 | 1.36651  |
| H | 0.96016  | 0.29519  | -1.00256 |
| H | 1.19376  | -1.44278 | -1.08926 |
| H | 2.76348  | -1.34249 | 0.85724  |
| H | 2.43206  | 0.37187  | 1.04536  |
| H | 3.41904  | 0.82101  | -1.20929 |
| H | 3.63699  | -0.89992 | -1.47017 |
| C | 5.19211  | 1.10828  | 0.92104  |
| H | 7.11853  | 0.08127  | -0.76716 |
| H | 6.04534  | -0.77665 | -1.88413 |
| H | 5.97232  | 0.98676  | -1.76362 |
| H | -0.77410 | -2.21083 | 2.06947  |
| H | 0.05105  | -2.96592 | 0.70106  |
| H | 0.97821  | -2.12697 | 1.95310  |

|   |         |         |         |
|---|---------|---------|---------|
| H | 6.20718 | 1.14636 | 1.33053 |
| H | 4.99533 | 2.07152 | 0.43430 |
| H | 4.50058 | 1.01384 | 1.76311 |

7c+7d

|   |          |          |          |
|---|----------|----------|----------|
| C | -5.26929 | 1.11050  | 0.33183  |
| C | -4.30245 | -0.80317 | -0.39955 |
| O | -2.98761 | -1.06949 | -0.62800 |
| C | -2.02924 | -0.12426 | -0.11757 |
| C | -0.66017 | -0.56581 | -0.61591 |
| C | 0.51363  | 0.25875  | -0.05472 |
| H | 0.44857  | 0.22777  | 1.04379  |
| C | 1.84765  | -0.40020 | -0.45792 |
| C | 3.09767  | 0.18080  | 0.21543  |
| C | 4.37413  | -0.58755 | -0.15055 |
| C | 5.65473  | -0.11230 | 0.56073  |
| H | 5.45975  | -0.13149 | 1.64332  |
| C | 6.81494  | -1.07633 | 0.27680  |
| O | -4.73869 | 0.47998  | -0.81208 |
| O | -5.68079 | 0.05625  | 1.17004  |
| O | -4.56047 | -0.84159 | 1.01337  |
| H | -4.87763 | -1.57008 | -0.92859 |
| H | -6.15727 | 1.69311  | 0.07026  |
| H | -4.50781 | 1.73303  | 0.82459  |
| H | -2.06570 | -0.12016 | 0.97783  |
| H | -2.29288 | 0.87461  | -0.47889 |
| H | -0.65202 | -0.52782 | -1.71280 |
| H | -0.52905 | -1.61856 | -0.33972 |
| C | 0.44213  | 1.73013  | -0.49321 |
| H | 1.96035  | -0.33933 | -1.55022 |
| H | 1.79064  | -1.47123 | -0.22148 |
| H | 2.96341  | 0.15963  | 1.30654  |
| H | 3.21181  | 1.23517  | -0.05854 |
| H | 4.53062  | -0.53669 | -1.23824 |
| H | 4.22144  | -1.65067 | 0.08074  |
| C | 6.04385  | 1.32286  | 0.17780  |
| H | 7.72347  | -0.77313 | 0.80779  |
| H | 6.57046  | -2.09830 | 0.58537  |
| H | 7.05031  | -1.10036 | -0.79421 |
| H | 1.26841  | 2.31437  | -0.07950 |
| H | 0.48979  | 1.81164  | -1.58605 |
| H | -0.48485 | 2.20973  | -0.16526 |
| H | 6.96354  | 1.62791  | 0.68812  |
| H | 6.22286  | 1.40271  | -0.90161 |
| H | 5.26681  | 2.04625  | 0.44116  |

9-TS1

|    |          |          |          |
|----|----------|----------|----------|
| C  | -1.72747 | -0.68783 | 0.78142  |
| C  | -1.57147 | -0.88762 | -0.50775 |
| H  | -1.32606 | -1.56969 | -1.30480 |
| H  | -1.50573 | -0.98249 | 1.79627  |
| C  | -2.48402 | 0.24609  | -0.10928 |
| C  | 0.54924  | 0.03811  | -0.70288 |
| H  | -3.56801 | 0.12666  | -0.20232 |
| H  | -2.14687 | 1.27720  | -0.24660 |
| Cl | 1.66681  | -1.10031 | 0.09235  |
| Cl | 0.68313  | 1.62359  | 0.09520  |

## 9-TS2

|    |          |          |          |
|----|----------|----------|----------|
| C  | 1.01036  | -1.03020 | -0.34676 |
| C  | 0.65193  | -0.79543 | 1.18869  |
| H  | 1.35772  | -0.35537 | 1.88672  |
| H  | 0.71372  | -1.95015 | -0.84304 |
| C  | 2.26232  | -0.46162 | -0.47700 |
| C  | -0.10739 | -0.08809 | 0.24728  |
| H  | 3.11224  | -1.04476 | -0.82319 |
| H  | 2.44591  | 0.55600  | -0.15521 |
| Cl | -1.74006 | -0.70858 | -0.17009 |
| Cl | -0.05599 | 1.71131  | -0.04983 |

## 9a

|    |          |          |          |
|----|----------|----------|----------|
| C  | 0.98131  | -0.79710 | -0.76197 |
| C  | 0.98131  | -0.79709 | 0.76198  |
| H  | 0.85598  | -1.59732 | 1.47830  |
| H  | 0.85598  | -1.59733 | -1.47829 |
| C  | 2.18578  | -0.33810 | 0.00001  |
| C  | -0.05570 | -0.08030 | 0.00000  |
| H  | 3.03607  | -1.01845 | 0.00001  |
| H  | 2.45324  | 0.71839  | 0.00001  |
| Cl | -1.68125 | -0.81743 | -0.00000 |
| Cl | -0.18683 | 1.73333  | -0.00000 |

## 9b

|    |          |          |          |
|----|----------|----------|----------|
| C  | -1.98960 | -1.02022 | 0.00000  |
| C  | -0.53030 | -1.10763 | -0.00000 |
| H  | -0.13742 | -2.12135 | -0.00000 |
| H  | -2.46396 | -2.00050 | 0.00001  |
| C  | -2.79826 | 0.05183  | 0.00000  |
| C  | 0.42002  | -0.15733 | -0.00001 |
| H  | -3.87531 | -0.08800 | 0.00001  |
| H  | -2.44077 | 1.07354  | -0.00000 |
| Cl | 2.11647  | -0.58362 | 0.00000  |
| Cl | 0.13684  | 1.55635  | 0.00000  |

## S7. Dimensionality Reduction Tests

The table below was generated without the linear correlation correction from section S4.

| Reaction       | React No. | Actual Maj | Pred Maj | BD1     | BD2      | $\mu_1$ | $\mu_2$ | $\lambda_1$ | $\lambda_2$ | $ \lambda $ | phi   | B(P1 P2) | B(P2 P1)                 | B(TS1 P1)                | B(TS1 P2)        | B(P1 TS1)                  | B(P2 TS1)                      | Exp/Traj %                         | Pred % | TST%  | Pred err | TST err |       |
|----------------|-----------|------------|----------|---------|----------|---------|---------|-------------|-------------|-------------|-------|----------|--------------------------|--------------------------|------------------|----------------------------|--------------------------------|------------------------------------|--------|-------|----------|---------|-------|
| Singleton2006* | Cl        | 1          | 1b       | 1a      | [4, 6]   | [2, 8]  | 0.045   | -0.042      | 1.207       | 1.139       | 0.358 | 10.664   | [4, 6]                   | [2, 8]                   | -                | -                          | [1, 7], [4, 6]                 | [1, 7], [2, 8]                     | 83.3   | 24.6  | 52.4     | -58.7   | -30.9 |
| Singleton2006  | Cl        | 1          | 1b       | 1b      | [4, 6]   | [1, 7]  | -0.044  | 0.048       | 0.433       | 0.439       | 0.484 | 6.626    | [4, 6]                   | [2, 8]                   | -                | -                          | [1, 7], [4, 6]                 | [1, 7], [2, 8]                     | 83.3   | 69.9  | 52.4     | -13.4   | -30.9 |
| Singleton2006  | Cl        | 1          | 1b       | 1a      | [1, 7]   | [2, 8]  | 0.311   | -0.194      | 0.458       | 0.424       | 0.577 | 22.502   | [4, 6]                   | [2, 8]                   | -                | -                          | [1, 7], [4, 6]                 | [1, 7], [2, 8]                     | 83.3   | 9.2   | 52.4     | -74.1   | -30.9 |
| Singleton2006* | Ph        | 2          | 2a       | 2a      | [4, 6]   | [2, 8]  | 0.008   | -0.005      | 1.151       | 1.134       | 0.248 | 2.189    | [4, 6]                   | [2, 8]                   | -                | -                          | [1, 7], [4, 6]                 | [1, 7], [2, 8]                     | 85.7   | 53.4  | 90.4     | -32.3   | -4.7  |
| Singleton2006  | Ph        | 2          | 2a       | 2b      | [4, 6]   | [1, 7]  | -0.114  | 0.097       | 0.230       | 0.251       | 0.315 | 23.949   | [4, 6]                   | [2, 8]                   | -                | -                          | [1, 7], [4, 6]                 | [1, 7], [2, 8]                     | 85.7   | 19.4  | 90.4     | -66.3   | -4.7  |
| Singleton2006  | Ph        | 2          | 2a       | 2a      | [1, 7]   | [2, 8]  | 0.272   | -0.110      | 0.268       | 0.230       | 0.326 | 26.60    | [4, 6]                   | [2, 8]                   | -                | -                          | [1, 7], [4, 6]                 | [1, 7], [2, 8]                     | 85.7   | 78.8  | 90.4     | -6.9    | -4.7  |
| Singleton2009* | borane    | 3          | 6b       | 6b      | [2, 10]  | [2, 4]  | 0.133   | -0.256      | 2.917       | 2.881       | 2.565 | 3.128    | [2, 10], [3, 4], [4, 12] | [2, 4], [3, 12], [4, 10] | [4, 10]          | [4, 12]                    | [2, 10], [3, 4]                | [2, 4], [3, 12]                    | 90.0   | 86.6  | 98.3     | -3.4    | 8.3   |
| Singleton2009  | borane    | 3          | 6b       | 6a      | [2, 10]  | [3, 12] | -0.358  | 0.170       | 2.216       | 2.626       | 2.080 | 5.857    | [2, 10], [3, 4], [4, 12] | [2, 4], [3, 12], [4, 10] | [4, 10]          | [4, 12]                    | [2, 10], [3, 4]                | [2, 4], [3, 12]                    | 90.0   | 12.7  | 98.3     | -77.3   | 8.3   |
| Singleton2009  | borane    | 3          | 6b       | 6b      | [3, 4]   | [2, 4]  | 0.362   | -0.327      | 2.701       | 2.836       | 2.399 | 5.377    | [2, 10], [3, 4], [4, 12] | [2, 4], [3, 12], [4, 10] | [4, 10]          | [4, 12]                    | [2, 10], [3, 4]                | [2, 4], [3, 12]                    | 90.0   | 79.5  | 98.3     | -10.5   | 8.3   |
| Singleton2009  | borane    | 3          | 6b       | 6a      | [3, 4]   | [3, 12] | -0.573  | 0.093       | 2.231       | 2.428       | 1.871 | 3.861    | [2, 10], [3, 4], [4, 12] | [2, 4], [3, 12], [4, 10] | [4, 10]          | [4, 12]                    | [2, 10], [3, 4]                | [2, 4], [3, 12]                    | 90.0   | 15.8  | 98.3     | -74.2   | 8.3   |
| Singleton2009  | borane    | 3          | 6b       | 6b      | [4, 12]  | [2, 4]  | 0.362   | -0.327      | 2.701       | 2.836       | 2.399 | 5.377    | [2, 10], [3, 4], [4, 12] | [2, 4], [3, 12], [4, 10] | [4, 10]          | [4, 12]                    | [2, 10], [3, 4]                | [2, 4], [3, 12]                    | 90.0   | 79.5  | 98.3     | -10.5   | 8.3   |
| Singleton2009  | borane    | 3          | 6b       | 6b      | [4, 12]  | [3, 12] | 16.786  | -0.012      | 1.005       | 2.160       | 1.091 | 0.959    | [2, 10], [3, 4], [4, 12] | [2, 4], [3, 12], [4, 10] | [4, 10]          | [4, 12]                    | [2, 10], [3, 4]                | [2, 4], [3, 12]                    | 90.0   | 73.7  | 98.3     | -16.3   | 8.3   |
| Singleton2009  | borane    | 3          | 6b       | 6a      | [2, 10]  | [4, 10] | -0.017  | 1.457       | 2.704       | 1.859       | 1.770 | 0.810    | [2, 10], [3, 4], [4, 12] | [2, 4], [3, 12], [4, 10] | [4, 10]          | [4, 12]                    | [2, 10], [3, 4]                | [2, 4], [3, 12]                    | 90.0   | 21.2  | 98.3     | -68.8   | 8.3   |
| Singleton2009  | borane    | 3          | 6b       | 6a      | [3, 4]   | [4, 10] | -0.017  | 1.394       | 2.510       | 1.165       | 1.520 | 0.959    | [2, 10], [3, 4], [4, 12] | [2, 4], [3, 12], [4, 10] | [4, 10]          | [4, 12]                    | [2, 10], [3, 4]                | [2, 4], [3, 12]                    | 90.0   | 26.7  | 98.3     | -63.3   | 8.3   |
| Singleton2011* | Me        | 4          | 7a/7b    | 7a/7b   | [1, 2]   | [1, 3]  | 1.443   | -0.138      | 0.857       | 0.759       | 0.606 | 9.711    | [1, 2]                   | [1, 3], [2, 4]           | [1, 5], [3, 4]   | [1, 2], [1, 5], [3, 4]     | [1, 3], [2, 3], [2, 4], [4, 5] | 96.4                               | 78.6   | 100.0 | -17.8    | 3.6     |       |
| Singleton2011  | Me        | 4          | 7a/7b    | 7a/7b   | [1, 2]   | [2, 3]  | 1.170   | -0.121      | 1.269       | 1.031       | 0.853 | 6.571    | [1, 2]                   | [1, 3], [2, 4]           | [1, 5], [3, 4]   | [1, 2], [1, 5], [3, 4]     | [1, 3], [2, 3], [2, 4], [4, 5] | 96.4                               | 88.6   | 100.0 | -7.8     | 3.6     |       |
| Singleton2011  | Me        | 4          | 7a/7b    | 7c/7d   | [1, 2]   | [2, 4]  | -0.018  | 0.032       | 1.028       | 1.032       | 0.972 | 1.472    | [1, 2]                   | [1, 3], [2, 4]           | [1, 5], [3, 4]   | [1, 2], [1, 5], [3, 4]     | [1, 3], [2, 3], [2, 4], [4, 5] | 96.4                               | 40.0   | 100.0 | -56.4    | 3.6     |       |
| Singleton2011  | Me        | 4          | 7a/7b    | 7a/7b   | [1, 2]   | [4, 5]  | 0.830   | -0.091      | 1.782       | 1.530       | 1.065 | 3.954    | [1, 2]                   | [1, 3], [2, 4]           | [1, 5], [3, 4]   | [1, 2], [1, 5], [3, 4]     | [1, 3], [2, 3], [2, 4], [4, 5] | 96.4                               | 83.4   | 100.0 | -13.0    | 3.6     |       |
| Singleton2011  | Me        | 4          | 7a/7b    | 7c/7d   | [2, 3]   | [1, 3]  | -0.375  | 0.076       | 0.956       | 1.033       | 1.025 | 2.675    | [1, 2]                   | [1, 3], [2, 4]           | [1, 5], [3, 4]   | [1, 2], [1, 5], [3, 4]     | [1, 3], [2, 3], [2, 4], [4, 5] | 96.4                               | 29.0   | 100.0 | -67.4    | 3.6     |       |
| Singleton2011  | Me        | 4          | 7a/7b    | 7c/7d   | [2, 3]   | [2, 4]  | -0.018  | 0.032       | 1.028       | 1.032       | 0.972 | 1.472    | [1, 2]                   | [1, 3], [2, 4]           | [1, 5], [3, 4]   | [1, 2], [1, 5], [3, 4]     | [1, 3], [2, 3], [2, 4], [4, 5] | 96.4                               | 40.0   | 100.0 | -56.4    | 3.6     |       |
| Singleton2011  | Me        | 4          | 7a/7b    | 7c/7d   | [4, 5]   | [1, 3]  | -1.646  | 0.454       | 1.025       | 1.516       | 1.207 | 13.177   | [1, 2]                   | [1, 3], [2, 4]           | [1, 5], [3, 4]   | [1, 2], [1, 5], [3, 4]     | [1, 3], [2, 3], [2, 4], [4, 5] | 96.4                               | 3.3    | 100.0 | -93.1    | 3.6     |       |
| Singleton2011  | Me        | 4          | 7a/7b    | 7c/7d   | [4, 5]   | [2, 4]  | -0.165  | 0.296       | 1.477       | 1.520       | 1.162 | 11.169   | [1, 2]                   | [1, 3], [2, 4]           | [1, 5], [3, 4]   | [1, 2], [1, 5], [3, 4]     | [1, 3], [2, 3], [2, 4], [4, 5] | 96.4                               | 10.6   | 100.0 | -85.8    | 3.6     |       |
| Singleton2011  | Me        | 4          | 7a/7b    | 7c/7d   | [2, 3]   | [4, 5]  | -4.825  | 13.742      | 0.052       | 1.174       | 1.348 | 11.169   | [1, 2]                   | [1, 3], [2, 4]           | [1, 5], [3, 4]   | [1, 2], [1, 5], [3, 4]     | [1, 3], [2, 3], [2, 4], [4, 5] | 96.4                               | 7.4    | 100.0 | -89.0    | 3.6     |       |
| Singleton2011* | But       | 5          | 8a/8b    | 8a/8b   | [6, 7]   | [1, 7]  | 1.455   | -0.140      | 0.852       | 0.616       | 0.776 | 6.121    | [6, 7]                   | [1, 7], [2, 6]           | [1, 2], [7, 8]   | [1, 2], [6, 7], [7, 8]     | [1, 6], [1, 7], [2, 6], [2, 8] | 97.8                               | 77.6   | 100.0 | -20.2    | 2.2     |       |
| Singleton2011  | But       | 5          | 8a/8b    | 8c/8d   | [1, 6]   | [1, 7]  | 0.381   | 0.079       | 0.958       | 1.036       | 1.040 | 2.748    | [6, 7]                   | [1, 7], [2, 6]           | [1, 2], [7, 8]   | [1, 2], [6, 7], [7, 8]     | [1, 6], [1, 7], [2, 6], [2, 8] | 97.8                               | 30.8   | 100.0 | -67.0    | 2.2     |       |
| Singleton2011  | But       | 5          | 8a/8b    | 8c/8d   | [1, 6]   | [2, 6]  | -0.015  | 0.033       | 1.032       | 1.035       | 0.985 | 1.4941   | [6, 7]                   | [1, 7], [2, 6]           | [1, 2], [7, 8]   | [1, 2], [6, 7], [7, 8]     | [1, 6], [1, 7], [2, 6], [2, 8] | 97.8                               | 40.7   | 100.0 | -57.1    | 2.2     |       |
| Singleton2011  | But       | 5          | 8a/8b    | 8c/8d   | [1, 6]   | [2, 8]  | -4.797  | 14.567      | 0.068       | 1.192       | 1.366 | 11.210   | [6, 7]                   | [1, 7], [2, 6]           | [1, 2], [7, 8]   | [1, 2], [6, 7], [7, 8]     | [1, 6], [1, 7], [2, 6], [2, 8] | 97.8                               | 13.2   | 100.0 | -84.6    | 2.2     |       |
| Singleton2011  | But       | 5          | 8a/8b    | 8c/8d   | [2, 8]   | [1, 7]  | -1.646  | 0.468       | 1.031       | 1.524       | 1.223 | 13.297   | [6, 7]                   | [1, 7], [2, 6]           | [1, 2], [7, 8]   | [1, 2], [6, 7], [7, 8]     | [1, 6], [1, 7], [2, 6], [2, 8] | 97.8                               | 9.6    | 100.0 | -88.2    | 2.2     |       |
| Singleton2011  | But       | 5          | 8a/8b    | 8c/8d   | [2, 8]   | [2, 6]  | -0.141  | 0.302       | 1.492       | 1.528       | 1.177 | 11.225   | [6, 7]                   | [1, 7], [2, 6]           | [1, 2], [7, 8]   | [1, 2], [6, 7], [7, 8]     | [1, 6], [1, 7], [2, 6], [2, 8] | 97.8                               | 11.6   | 100.0 | -86.2    | 2.2     |       |
| Singleton2011  | But       | 5          | 8a/8b    | 8a/8b   | [6, 7]   | [1, 6]  | 1.188   | -0.124      | 1.274       | 1.034       | 0.865 | 6.636    | [6, 7]                   | [1, 7], [2, 6]           | [1, 2], [7, 8]   | [1, 2], [6, 7], [7, 8]     | [1, 6], [1, 7], [2, 6], [2, 8] | 97.8                               | 86.6   | 100.0 | -11.2    | 2.2     |       |
| Singleton2011  | But       | 5          | 8a/8b    | 8c/8d   | [6, 7]   | [2, 6]  | -0.015  | 0.033       | 1.032       | 1.035       | 0.985 | 1.494    | [6, 7]                   | [1, 7], [2, 6]           | [1, 2], [7, 8]   | [1, 2], [6, 7], [7, 8]     | [1, 6], [1, 7], [2, 6], [2, 8] | 97.8                               | 40.7   | 100.0 | -57.1    | 2.2     |       |
| Singleton2011  | But       | 5          | 8a/8b    | 8a/8b   | [6, 7]   | [2, 8]  | 0.858   | -0.094      | 1.797       | 1.537       | 1.078 | 4.060    | [6, 7]                   | [1, 7], [2, 6]           | [1, 2], [7, 8]   | [1, 2], [6, 7], [7, 8]     | [1, 6], [1, 7], [2, 6], [2, 8] | 97.8                               | 79.2   | 100.0 | -18.6    | 2.2     |       |
| Singleton2011* | Oct       | 6          | 9a/9b    | 9a/9b   | [6, 7]   | [1, 7]  | 0.986   | -0.115      | 0.895       | 0.808       | 0.616 | 7.637    | [6, 7]                   | [1, 7], [2, 6]           | [1, 2], [7, 8]   | [1, 2], [6, 7], [7, 8]     | [1, 6], [1, 7], [2, 6], [2, 8] | 98.2                               | 69.1   | 100.0 | -29.1    | 1.8     |       |
| Singleton2011  | Oct       | 6          | 9a/9b    | 9a/9b   | [6, 7]   | [1, 6]  | 0.747   | -0.094      | 1.196       | 1.048       | 0.866 | 5.010    | [6, 7]                   | [1, 7], [2, 6]           | [1, 2], [7, 8]   | [1, 2], [6, 7], [7, 8]     | [1, 6], [1, 7], [2, 6], [2, 8] | 98.2                               | 79.3   | 100.0 | -18.9    | 1.8     |       |
| Singleton2011  | Oct       | 6          | 9a/9b    | 9a/9b   | [6, 7]   | [2, 6]  | 0.014   | -0.044      | 1.052       | 1.049       | 0.986 | 2.097    | [6, 7]                   | [1, 7], [2, 6]           | [1, 2], [7, 8]   | [1, 2], [6, 7], [7, 8]     | [1, 6], [1, 7], [2, 6], [2, 8] | 98.2                               | 59.3   | 100.0 | -38.9    | 1.8     |       |
| Singleton2011  | Oct       | 6          | 9a/9b    | 9a/9b   | [6, 7]   | [2, 8]  | 0.376   | -0.051      | 1.664       | 1.545       | 1.079 | 2.189    | [6, 7]                   | [1, 7], [2, 6]           | [1, 2], [7, 8]   | [1, 2], [6, 7], [7, 8]     | [1, 6], [1, 7], [2, 6], [2, 8] | 98.2                               | 66.8   | 100.0 | -31.4    | 1.8     |       |
| Singleton2011  | Oct       | 6          | 9a/9b    | 9c/9d   | [1, 6]   | [1, 7]  | -0.361  | 0.073       | 0.978       | 1.050       | 1.041 | 2.550    | [6, 7]                   | [1, 7], [2, 6]           | [1, 2], [7, 8]   | [1, 2], [6, 7], [7, 8]     | [1, 6], [1, 7], [2, 6], [2, 8] | 98.2                               | 36.6   | 100.0 | -61.6    | 1.8     |       |
| Singleton2011  | Oct       | 6          | 9a/9b    | 9a/9b   | [1, 6]   | [2, 6]  | 0.014   | -0.044      | 1.052       | 1.049       | 0.986 | 2.097    | [6, 7]                   | [1, 7], [2, 6]           | [1, 2], [7, 8]   | [1, 2], [6, 7], [7, 8]     | [1, 6], [1, 7], [2, 6], [2, 8] | 98.2                               | 59.3   | 100.0 | -38.9    | 1.8     |       |
| Singleton2011  | Oct       | 6          | 9a/9b    | 9c/9d   | [1, 6]   | [2, 8]  | -4.056  | 13.837      | 0.251       | 1.204       | 1.367 | 10.990   | [6, 7]                   | [1, 7], [2, 6]           | [1, 2], [7, 8]   | [1, 2], [6, 7], [7, 8]     | [1, 6], [1, 7], [2, 6], [2, 8] | 98.2                               | 20.1   | 100.0 | -78.1    | 1.8     |       |
| Singleton2011  | Oct       | 6          | 9a/9b    | 9c/9d   | [2, 8]   | [2, 6]  | -0.058  | 0.184       | 1.525       | 1.539       | 1.177 | 7.165    | [6, 7]                   | [1, 7], [2, 6]           | [1, 2], [7, 8]   | [1, 2], [6, 7], [7, 8]     | [1, 6], [1, 7], [2, 6], [2, 8] | 98.2                               | 20.4   | 100.0 | -77.8    | 1.8     |       |
| Singleton2011  | Oct       | 6          | 9a/9b    | 9c/9d   | [2, 8]   | [1, 7]  | -1.545  | 0.450       | 1.052       | 1.533       | 1.224 | 12.872   | [6, 7]                   | [1, 7], [2, 6]           | [1, 2], [7, 8]   | [1, 2], [6, 7], [7, 8]     | [1, 6], [1, 7], [2, 6], [2, 8] | 98.2                               | 12.4   | 100.0 | -85.8    | 1.8     |       |
| Singleton2011* | dimeOct   | 7          | 10a/10b  | 10a/10b | [14, 15] | [1, 15] | 1.236   | -0.141      | 0.864       | 0.762       | 0.618 | 9.752    | [14, 15]                 | [1, 15], [2, 14]         | [1, 2], [15, 16] | [1, 2], [14, 15], [15, 16] | [1, 14], [2, 16]               | [1, 14], [1, 15], [2, 14], [2, 16] | 98.3   | 76.3  | 100.0    | -22.0   | 1.7   |
| Singleton2011  | dimeOct   | 7          | 10a/10b  | 10a/10b | [14, 15] | [1, 14] | 1.033   | -0.124      | 1.243       | 1.040       | 0.867 | 6.616    | [14, 15]                 | [1, 15], [2, 14]         | [1, 2], [15, 16] | [1, 2], [14, 15], [15, 16] | [1, 14], [2, 16]               | [1, 14], [1, 15], [2, 14], [2, 16  |        |       |          |         |       |



## S8. All Final Results

| Reaction       | React No.  | Actual Maj | Pred Maj | BD1   | BD2      | $\mu_1$  | $\mu_2$ | $\lambda_1$ | $\lambda_2$ | $ \xi $ | $\phi$ | B(P1 P2) | B(P2 P1)                 | B(TS1 P1)                | B(TS1 P2)        | B(P1 TS1)                  | B(P2 TS1)          | Exp/Traj %                         | Pred % | TST% | Pred err | TST err |       |
|----------------|------------|------------|----------|-------|----------|----------|---------|-------------|-------------|---------|--------|----------|--------------------------|--------------------------|------------------|----------------------------|--------------------|------------------------------------|--------|------|----------|---------|-------|
| Singleton2006  | Cl         | 1          | 1b       | 1b    | [4, 6]   | [1, 7]   | -0.044  | 0.048       | 0.433       | 0.439   | 0.484  | 6.626    | [4, 6]                   | [2, 8]                   | -                | -                          | [1, 7], [4, 6]     | [1, 7], [2, 8]                     | 83.3   | 82.9 | 52.4     | -0.4    | -30.9 |
| Singleton2006  | Ph         | 2          | 2a       | 2a    | [4, 6]   | [2, 8]   | 0.008   | -0.005      | 1.151       | 1.134   | 0.248  | 2.189    | [4, 6]                   | [2, 8]                   | -                | -                          | [1, 7], [4, 6]     | [1, 7], [2, 8]                     | 85.7   | 90.4 | 90.4     | 4.7     | 4.7   |
| Singleton2009  | borane     | 3          | 3a       | 3a    | [2, 10]  | [2, 4]   | 0.133   | -0.256      | 2.917       | 2.881   | 2.565  | 3.128    | [2, 10], [3, 4], [4, 12] | [2, 4], [3, 12], [4, 10] | [4, 10]          | [4, 12]                    | [2, 10], [3, 4]    | [2, 4], [3, 12]                    | 90.0   | 91.4 | 98.3     | 1.4     | 8.3   |
| Singleton2011  | Me         | 4          | 4a/4b    | 4a/4b | [1, 2]   | [2, 3]   | 1.170   | -0.121      | 1.269       | 1.031   | 0.853  | 6.571    | [1, 2]                   | [1, 3], [2, 4]           | [1, 5], [3, 4]   | [1, 2], [1, 5], [3, 4]     | [2, 3], [4, 5]     | [1, 3], [2, 3], [2, 4], [4, 5]     | 96.4   | 97.1 | 100.0    | 0.7     | 3.6   |
| Singleton2011  | But        | 5          | 5a/5b    | 5a/5b | [6, 7]   | [1, 6]   | 1.188   | -0.124      | 1.274       | 1.034   | 0.865  | 6.636    | [6, 7]                   | [1, 7], [2, 6]           | [1, 2], [7, 8]   | [1, 2], [6, 7], [7, 8]     | [1, 6], [2, 8]     | [1, 6], [1, 7], [2, 6], [2, 8]     | 97.8   | 95.0 | 100.0    | -2.8    | 2.2   |
| Singleton2011  | Oct        | 6          | 6a/6b    | 6a/6b | [6, 7]   | [1, 6]   | 0.747   | -0.094      | 1.196       | 1.048   | 0.866  | 5.010    | [6, 7]                   | [1, 7], [2, 6]           | [1, 2], [7, 8]   | [1, 2], [6, 7], [7, 8]     | [1, 6], [2, 8]     | [1, 6], [1, 7], [2, 6], [2, 8]     | 98.2   | 88.8 | 100.0    | -9.4    | 1.8   |
| Singleton2011  | dimeOct    | 7          | 7a/7b    | 7a/7b | [14, 15] | [1, 14]  | 1.033   | -0.124      | 1.243       | 1.040   | 0.867  | 6.616    | [14, 15]                 | [1, 15], [2, 14]         | [1, 2], [15, 16] | [1, 2], [14, 15], [15, 16] | [1, 14], [2, 16]   | [1, 14], [1, 15], [2, 14], [2, 16] | 98.3   | 89.1 | 100.0    | -9.2    | 1.7   |
| Schmittel2014A | trip-trip  | 8          | 8a       | 8a/8b | [17, 41] | [17, 18] | -0.043  | 0.243       | 2.276       | 3.845   | 0.588  | 13.419   | [17, 41], [18, 40]       | [17, 18], [40, 41]       | [40, 41]         | [18, 40]                   | [15, 16], [17, 41] | [15, 16], [17, 18]                 | 91.1   | 92.2 | 100.0    | 1.1     | 8.9   |
| Meyer2005      | Cl         | 9          | 9a       | 9a/9b | [2, 5]   | [1, 6]   | -2.177  | 0.809       | 5.974       | 2.338   | 1.489  | 27.49    | -                        | [3, 6], [2, 5]           | [2, 5]           | -                          | [2, 6]             | [1, 6], [2, 6]                     | 80.0   | 85.5 | -        | 5.5     | -     |
| Schmittel2014  | TMS/NiCH32 | 10-TS1     | -        | -     | [5, 22]  | [5, 34]  | 0.601   | -0.458      | 10.139      | 1.401   | 0.921  | 64.887   | [5, 22]                  | [5, 34]                  | -                | -                          | [3, 4], [5, 22]    | [3, 4], [5, 34]                    | -      | 89.5 | -        | -       | -     |
| Schmittel2014  | TMS/NiCH32 | 10-TS1d    | -        | -     | [5, 22]  | [5, 34]  | -0.388  | 0.554       | 1.942       | 9.693   | 0.837  | 60.772   | [5, 22]                  | [5, 34]                  | -                | -                          | [3, 4], [5, 22]    | [3, 4], [5, 34]                    | -      | 84.3 | -        | -       | -     |
| Schmittel2014  | TMS/OCH3   | 11-TS1     | -        | -     | [15, 41] | [15, 42] | 0.610   | -0.526      | 8.194       | 0.522   | 1.013  | 66.175   | [15, 41]                 | [15, 42]                 | -                | -                          | [7, 14], [15, 41]  | [7, 14], [15, 42]                  | -      | 92.4 | -        | -       | -     |
| Schmittel2014  | TMS/OCH3   | 11-TS1d    | -        | -     | [15, 41] | [15, 42] | -0.395  | 0.559       | 2.282       | 10.165  | 0.881  | 58.210   | [15, 41]                 | [15, 42]                 | -                | -                          | [7, 14], [15, 41]  | [7, 14], [15, 42]                  | -      | 85.6 | -        | -       | -     |
| Schmittel2014  | tBu/NiCH32 | 12-TS1     | -        | -     | [12, 39] | [12, 38] | 0.648   | -0.390      | 12.588      | 4.141   | 0.862  | 56.893   | [12, 39]                 | [12, 38]                 | -                | -                          | [11, 26], [12, 39] | [11, 26], [12, 38]                 | -      | 85.9 | -        | -       | -     |
| Schmittel2014  | tBu/NiCH32 | 12-TS1d    | -        | -     | [12, 39] | [12, 38] | -0.276  | 0.442       | 3.039       | 8.127   | 0.649  | 51.571   | [12, 39]                 | [12, 38]                 | -                | -                          | [11, 26], [12, 39] | [11, 26], [12, 38]                 | -      | 84.5 | -        | -       | -     |

## S9. TS1 and TS2 Free Energy Difference

**Table S2.** Summary table of free energy difference between TS1 and the two TS2 geometries

| Reaction       |           | React No. | $\Delta G(\text{TS1}/\text{INT})$ | $G(\text{TS2A}/\text{INT})$ | $G(\text{TS2B}/\text{INT})$ |
|----------------|-----------|-----------|-----------------------------------|-----------------------------|-----------------------------|
| Singleton2006  | Cl        | 1         | 12.600                            | 5.217                       | 4.978                       |
| Singleton2006  | Ph        | 2         | 1.520                             | 3.831                       | 9.394                       |
| Singleton2009  | borane    | 3         | 19.686                            | 2.941                       | 13.043                      |
| Singleton2011  | Me        | 4         | 223.047                           | 54.823                      | 76.549                      |
| Singleton2011  | But       | 5         | 221.708                           | 58.664                      | 77.704                      |
| Singleton2011  | Oct       | 6         | 221.676                           | 55.766                      | 74.774                      |
| Singleton2011  | dimeOct   | 7         | 221.834                           | 56.083                      | 74.934                      |
| Schmittel2014A | trip-trip | 8         | 246.889                           | 123.225                     | 66.627                      |
